# Supplementary material for: Two decades of distributed global radiation time series across a mountainous semiarid area (Sierra Nevada, Spain)
Source: Copernicus journal article supplement (doi:10.5194/essd-13-1335-2021), 2021-03-29
Supplement: Supplementary file 1 [file essd-13-1335-2021-supplement.zip]

Archive with 2 entries (2 files):
- observed-simulated_stations_values.txt
- essd-13-1335-2021-supplement-title-page.pdf
