# Supplementary material for: Two decades of distributed global radiation time series across a mountainous semiarid area (Sierra Nevada, Spain)
Source: Copernicus journal article supplement (doi:10.5194/essd-13-1335-2021), 2021-03-29
Supplement: Supplementary file 1 [file essd-13-1335-2021-supplement.zip › essd-13-1335-2021-supplement-title-page.pdf]

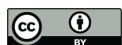

## *Supplement of*

# **Two decades of distributed global radiation time series across a mountainous semiarid area (Sierra Nevada, Spain)**

**Cristina Aguilar et al.**

*Correspondence to:* Cristina Aguilar (caguilar@uco.es)

- [essd-13-1335-2021-supplement-title-page.pdf](#)
- [observed-simulated\\_stations\\_values.txt](#)

The copyright of individual parts of the supplement might differ from the article licence.
