# Supplementary material for: Two decades of distributed global radiation time series across a mountainous semiarid area (Sierra Nevada, Spain)
Source: Copernicus journal article supplement (doi:10.5194/essd-13-1335-2021), 2021-03-29
Supplement: Supplementary file 1 [file essd-13-1335-2021-supplement.zip › observed-simulated_stations_values.txt]

##################################################
# 1 - observed value
# 0 - simulated value
##################################################
date	601	602	604	608	802	803	804	853	854	855	857	858	859	860	1001	1002
2000-02-01	0	0	0	1	0	0	0	0	0	0	0	0	0	0	0	0
2000-02-02	0	0	0	1	0	0	0	0	0	0	0	0	0	0	0	0
2000-02-03	0	0	0	1	0	0	0	0	0	0	0	0	0	0	0	0
2000-02-04	0	0	0	1	0	0	0	0	0	0	0	0	0	0	0	0
2000-02-05	0	0	0	1	0	0	0	0	0	0	0	0	0	0	0	0
2000-02-06	0	0	0	1	0	0	0	0	0	0	0	0	0	0	0	0
2000-02-07	0	0	0	1	0	0	0	0	0	0	0	0	0	0	0	0
2000-02-08	0	0	0	1	0	0	0	0	0	0	0	0	0	0	0	0
2000-02-09	0	0	0	1	0	0	0	0	0	0	0	0	0	0	0	0
2000-02-10	0	0	0	1	0	0	0	0	0	0	0	0	0	0	0	0
2000-02-11	0	0	0	1	0	0	0	0	0	0	0	0	0	0	0	0
2000-02-12	0	0	0	1	0	0	0	0	0	0	0	0	0	0	0	0
2000-02-13	0	0	0	1	0	0	0	0	0	0	0	0	0	0	0	0
2000-02-14	0	0	0	1	0	0	0	0	0	0	0	0	0	0	0	0
2000-02-15	0	0	0	1	0	0	0	0	0	0	0	0	0	0	0	0
2000-02-16	0	0	0	1	0	0	0	0	0	0	0	0	0	0	0	0
2000-02-17	0	0	0	1	0	0	0	0	0	0	0	0	0	0	0	0
2000-02-18	0	0	0	1	0	0	0	0	0	0	0	0	0	0	0	0
2000-02-19	0	0	0	1	0	0	0	0	0	0	0	0	0	0	0	0
2000-02-20	0	0	0	1	0	0	0	0	0	0	0	0	0	0	0	0
2000-02-21	0	0	0	1	0	0	0	0	0	0	0	0	0	0	0	0
2000-02-22	0	0	0	1	0	0	0	0	0	0	0	0	0	0	0	0
2000-02-23	0	0	0	1	0	0	0	0	0	0	0	0	0	0	0	0
2000-02-24	0	0	0	1	0	0	0	0	0	0	0	0	0	0	0	0
2000-02-25	0	0	0	1	0	0	0	0	0	0	0	0	0	0	0	0
2000-02-26	0	0	0	1	0	0	0	0	0	0	0	0	0	0	0	0
2000-02-27	0	0	0	1	0	0	0	0	0	0	0	0	0	0	0	0
2000-02-28	0	0	0	1	0	0	0	0	0	0	0	0	0	0	0	0
2000-02-29	0	0	0	1	0	0	0	0	0	0	0	0	0	0	0	0
2000-03-01	0	0	0	1	0	0	0	0	0	0	0	0	0	0	0	0
2000-03-02	0	0	0	1	0	0	0	0	0	0	0	0	0	0	0	0
2000-03-03	0	0	0	1	0	0	0	0	0	0	0	0	0	0	0	0
2000-03-04	0	0	0	1	0	0	0	0	0	0	0	0	0	0	0	0
2000-03-05	0	0	0	1	0	0	0	0	0	0	0	0	0	0	0	0
2000-03-06	0	0	0	1	0	0	0	0	0	0	0	0	0	0	0	0
2000-03-07	0	0	0	1	0	0	0	0	0	0	0	0	0	0	0	0
2000-03-08	0	0	0	1	0	0	0	0	0	0	0	0	0	0	0	0
2000-03-09	0	0	0	1	0	0	0	0	0	0	0	0	0	0	0	0
2000-03-10	0	0	0	1	0	0	0	0	0	0	0	0	0	0	0	0
2000-03-11	0	0	0	1	0	0	0	0	0	0	0	0	0	0	0	0
2000-03-12	0	0	0	1	0	0	0	0	0	0	0	0	0	0	0	0
2000-03-13	0	0	0	1	0	0	0	0	0	0	0	0	0	0	0	0
2000-03-14	0	0	0	1	0	0	0	0	0	0	0	0	0	0	0	0
2000-03-15	0	0	0	1	0	0	0	0	0	0	0	0	0	0	0	0
2000-03-16	0	0	0	1	0	0	0	0	0	0	0	0	0	0	0	0
2000-03-17	0	0	0	1	0	0	0	0	0	0	0	0	0	0	0	0
2000-03-18	0	0	0	1	0	0	0	0	0	0	0	0	0	0	0	0
2000-03-19	0	0	0	1	0	0	0	0	0	0	0	0	0	0	0	0
2000-03-20	0	0	0	1	0	0	0	0	0	0	0	0	0	0	0	0
2000-03-21	0	0	0	1	0	0	0	0	0	0	0	0	0	0	0	0
2000-03-22	0	0	0	1	0	0	0	0	0	0	0	0	0	0	0	0
2000-03-23	0	0	0	1	0	0	0	0	0	0	0	0	0	0	0	0
2000-03-24	0	0	0	1	0	0	0	0	0	0	0	0	0	0	0	0
2000-03-25	0	0	0	1	0	0	0	0	0	0	0	0	0	0	0	0
2000-03-26	0	0	0	1	0	0	0	0	0	0	0	0	0	0	0	0
2000-03-27	0	0	0	1	0	0	0	0	0	0	0	0	0	0	0	0
2000-03-28	0	0	0	1	0	0	0	0	0	0	0	0	0	0	0	0
2000-03-29	0	0	0	1	0	0	0	0	0	0	0	0	0	0	0	0
2000-03-30	0	0	0	1	0	0	0	0	0	0	0	0	0	0	0	0
2000-03-31	0	0	0	1	0	0	0	0	0	0	0	0	0	0	0	0
2000-04-01	0	0	0	1	0	0	0	0	0	0	0	0	0	0	0	0
2000-04-02	0	0	0	1	0	0	0	0	0	0	0	0	0	0	0	0
2000-04-03	0	0	0	1	0	0	0	0	0	0	0	0	0	0	0	0
2000-04-04	0	0	0	1	0	0	0	0	0	0	0	0	0	0	0	0
2000-04-05	0	0	0	1	0	0	0	0	0	0	0	0	0	0	0	0
2000-04-06	0	0	0	1	0	0	0	0	0	0	0	0	0	0	0	0
2000-04-07	0	0	0	1	0	0	0	0	0	0	0	0	0	0	0	0
2000-04-08	0	0	0	1	0	0	0	0	0	0	0	0	0	0	0	0
2000-04-09	0	0	0	1	0	0	0	0	0	0	0	0	0	0	0	0
2000-04-10	0	0	0	1	0	0	0	0	0	0	0	0	0	0	0	0
2000-04-11	0	0	0	1	0	0	0	0	0	0	0	0	0	0	0	0
2000-04-12	0	0	0	1	0	0	0	0	0	0	0	0	0	0	0	0
2000-04-13	0	0	0	1	0	0	0	0	0	0	0	0	0	0	0	0
2000-04-14	0	0	0	1	0	0	0	0	0	0	0	0	0	0	0	0
2000-04-15	0	0	0	1	0	0	0	0	0	0	0	0	0	0	0	0
2000-04-16	0	0	0	1	0	0	0	0	0	0	0	0	0	0	0	0
2000-04-17	0	0	0	1	0	0	0	0	0	0	0	0	0	0	0	0
2000-04-18	0	0	0	1	0	0	0	0	0	0	0	0	0	0	0	0
2000-04-19	0	0	0	1	0	0	0	0	0	0	0	0	0	0	0	0
2000-04-20	0	0	0	1	0	0	0	0	0	0	0	0	0	0	0	0
2000-04-21	0	0	0	1	0	0	0	0	0	0	0	0	0	0	0	0
2000-04-22	0	0	0	1	0	0	0	0	0	0	0	0	0	0	0	0
2000-04-23	0	0	0	1	0	0	0	0	0	0	0	0	0	0	0	0
2000-04-24	0	0	0	1	0	0	0	0	0	0	0	0	0	0	0	0
2000-04-25	0	0	0	1	0	0	0	0	0	0	0	0	0	0	0	0
2000-04-26	0	0	0	1	0	0	0	0	0	0	0	0	0	0	0	0
2000-04-27	0	0	0	1	0	0	0	0	0	0	0	0	0	0	0	0
2000-04-28	0	0	0	1	0	0	0	0	0	0	0	0	0	0	0	0
2000-04-29	0	0	0	1	0	0	0	0	0	0	0	0	0	0	0	0
2000-04-30	0	0	0	1	0	0	0	0	0	0	0	0	0	0	0	0
2000-05-01	0	0	0	1	0	0	0	0	0	0	0	0	0	0	0	0
2000-05-02	0	0	0	1	0	0	0	0	0	0	0	0	0	0	0	0
2000-05-03	0	0	0	1	0	0	0	0	0	0	0	0	0	0	0	0
2000-05-04	0	0	0	1	0	0	0	0	0	0	0	0	0	0	0	0
2000-05-05	0	0	0	1	0	0	0	0	0	0	0	0	0	0	0	0
2000-05-06	0	0	0	1	0	0	0	0	0	0	0	0	0	0	0	0
2000-05-07	0	0	0	1	0	0	0	0	0	0	0	0	0	0	0	0
2000-05-08	0	0	0	1	0	0	0	0	0	0	0	0	0	0	0	0
2000-05-09	0	0	0	1	0	0	0	0	0	0	0	0	0	0	0	0
2000-05-10	0	0	0	1	0	0	0	0	0	0	0	0	0	0	0	0
2000-05-11	0	0	0	1	0	0	0	0	0	0	0	0	0	0	0	0
2000-05-12	0	0	0	1	0	0	0	0	0	0	0	0	0	0	0	0
2000-05-13	0	0	0	1	0	0	0	0	0	0	0	0	0	0	0	0
2000-05-14	0	0	0	1	0	0	0	0	0	0	0	0	0	0	0	0
2000-05-15	0	0	0	1	0	0	0	0	0	0	0	0	0	0	0	0
2000-05-16	0	0	0	1	0	0	0	0	0	0	0	0	0	0	0	0
2000-05-17	0	0	0	1	0	0	0	0	0	0	0	0	0	0	0	0
2000-05-18	0	0	0	1	0	0	0	0	0	0	0	0	0	0	0	0
2000-05-19	0	0	0	1	0	0	0	0	0	0	0	0	0	0	0	0
2000-05-20	0	0	0	1	0	0	0	0	0	0	0	0	0	0	0	0
2000-05-21	0	0	0	1	0	0	0	0	0	0	0	0	0	0	0	0
2000-05-22	0	0	0	1	0	0	0	0	0	0	0	0	0	0	0	0
2000-05-23	0	0	0	1	0	0	0	0	0	0	0	0	0	0	0	0
2000-05-24	0	0	0	1	0	0	0	0	0	0	0	0	0	0	0	0
2000-05-25	0	0	0	1	0	0	0	0	0	0	0	0	0	0	0	0
2000-05-26	0	0	0	1	0	0	0	0	0	0	0	0	0	0	0	0
2000-05-27	0	0	0	1	0	0	0	0	0	0	0	0	0	0	0	0
2000-05-28	0	0	0	1	0	0	0	0	0	0	0	0	0	0	0	0
2000-05-29	0	0	0	1	0	0	0	0	0	0	0	0	0	0	0	0
2000-05-30	0	0	0	1	0	0	0	0	0	0	0	0	0	0	0	0
2000-05-31	0	0	0	1	0	0	0	0	0	0	0	0	0	0	0	0
2000-06-01	0	0	0	1	0	0	0	0	0	0	0	0	0	0	0	0
2000-06-02	0	0	0	1	0	0	0	0	0	0	0	0	0	0	0	0
2000-06-03	0	0	0	1	0	0	0	0	0	0	0	0	0	0	0	0
2000-06-04	0	0	0	1	0	0	0	0	0	0	0	0	0	0	0	0
2000-06-05	0	0	0	1	0	0	0	0	0	0	0	0	0	0	0	0
2000-06-06	0	0	0	1	0	0	0	0	0	0	0	0	0	0	0	0
2000-06-07	0	0	0	1	0	0	0	0	0	0	0	0	0	0	0	0
2000-06-08	0	0	0	1	0	0	0	0	0	0	0	0	0	0	0	0
2000-06-09	0	0	0	1	0	0	0	0	0	0	0	0	0	0	0	0
2000-06-10	0	0	0	1	0	0	0	0	0	0	0	0	0	0	0	0
2000-06-11	0	0	0	1	0	0	0	0	0	0	0	0	0	0	0	0
2000-06-12	0	0	0	1	0	0	0	0	0	0	0	0	0	0	0	0
2000-06-13	0	0	0	1	0	0	0	0	0	0	0	0	0	0	0	0
2000-06-14	0	0	0	1	0	0	0	0	0	0	0	0	0	0	0	0
2000-06-15	0	0	0	1	0	0	0	0	0	0	0	0	0	0	0	0
2000-06-16	0	0	0	1	0	0	0	0	0	0	0	0	0	0	0	0
2000-06-17	0	0	0	1	0	0	0	0	0	0	0	0	0	0	0	0
2000-06-18	0	0	0	1	0	0	0	0	0	0	0	0	0	0	0	0
2000-06-19	0	0	0	1	0	0	0	0	0	0	0	0	0	0	0	0
2000-06-20	0	0	0	1	0	0	0	0	0	0	0	0	0	0	0	0
2000-06-21	0	0	0	1	0	0	0	0	0	0	0	0	0	0	0	0
2000-06-22	0	0	0	1	0	0	0	0	0	0	0	0	0	0	0	0
2000-06-23	0	0	0	1	0	0	0	0	0	0	0	0	0	0	0	0
2000-06-24	0	0	0	1	0	0	0	0	0	0	0	0	0	0	0	0
2000-06-25	0	0	0	1	0	0	0	0	0	0	0	0	0	0	0	0
2000-06-26	0	0	0	1	0	0	0	0	0	0	0	0	0	0	0	0
2000-06-27	0	0	0	1	0	0	0	0	0	0	0	0	0	0	0	0
2000-06-28	0	0	0	1	0	0	0	0	0	0	0	0	0	0	0	0
2000-06-29	0	0	0	1	0	0	0	0	0	0	0	0	0	0	0	0
2000-06-30	0	0	0	1	0	0	0	0	0	0	0	0	0	0	0	0
2000-07-01	0	0	0	1	0	0	0	0	0	0	0	0	0	0	0	0
2000-07-02	0	0	0	1	0	0	0	0	0	0	0	0	0	0	0	0
2000-07-03	0	0	0	1	0	0	0	0	0	0	0	0	0	0	0	0
2000-07-04	0	0	0	1	0	0	0	0	0	0	0	0	0	0	0	0
2000-07-05	0	0	0	1	0	0	0	0	0	0	0	0	0	0	0	0
2000-07-06	0	0	0	1	0	0	0	0	0	0	0	0	0	0	0	0
2000-07-07	0	0	0	1	0	0	0	0	0	0	0	0	0	0	0	0
2000-07-08	0	0	0	1	0	0	0	0	0	0	0	0	0	0	0	0
2000-07-09	0	0	0	1	0	0	0	0	0	0	0	0	0	0	0	0
2000-07-10	0	0	0	1	0	0	0	0	0	0	0	0	0	0	0	0
2000-07-11	0	0	0	1	0	0	0	0	0	0	0	0	0	0	0	0
2000-07-12	0	0	0	1	0	0	0	0	0	0	0	0	0	0	0	0
2000-07-13	0	0	0	1	0	0	0	0	0	0	0	0	0	0	0	0
2000-07-14	0	0	0	1	0	0	0	0	0	0	0	0	0	0	0	0
2000-07-15	0	0	0	1	0	0	0	0	0	0	0	0	0	0	0	0
2000-07-16	0	0	0	1	0	0	0	0	0	0	0	0	0	0	0	0
2000-07-17	0	0	0	1	0	0	0	0	0	0	0	0	0	0	0	0
2000-07-18	0	0	0	1	0	0	0	0	0	0	0	0	0	0	0	0
2000-07-19	0	0	0	1	0	0	0	0	0	0	0	0	0	0	0	0
2000-07-20	0	0	0	1	0	0	0	0	0	0	0	0	0	0	0	0
2000-07-21	0	0	0	1	0	0	0	0	0	0	0	0	0	0	0	0
2000-07-22	0	0	0	1	0	0	0	0	0	0	0	0	0	0	0	0
2000-07-23	0	0	0	1	0	0	0	0	0	0	0	0	0	0	0	0
2000-07-24	0	0	0	1	0	0	0	0	0	0	0	0	0	0	0	0
2000-07-25	0	0	0	1	0	0	0	0	0	0	0	0	0	0	0	0
2000-07-26	0	0	0	1	0	0	0	0	0	0	0	0	0	0	0	0
2000-07-27	0	0	0	1	0	0	0	0	0	0	0	0	0	0	0	0
2000-07-28	0	0	0	1	0	0	0	0	0	0	0	0	0	0	0	0
2000-07-29	0	0	0	1	0	0	0	0	0	0	0	0	0	0	0	0
2000-07-30	0	0	0	1	0	0	0	0	0	0	0	0	0	0	0	0
2000-07-31	0	0	0	1	0	0	0	0	0	0	0	0	0	0	0	0
2000-08-01	0	0	0	1	0	0	0	0	0	0	0	0	0	0	0	0
2000-08-02	0	0	0	1	0	0	0	0	0	0	0	0	0	0	0	0
2000-08-03	0	0	0	1	0	0	0	0	0	0	0	0	0	0	0	0
2000-08-04	0	0	0	1	0	0	0	0	0	0	0	0	0	0	0	0
2000-08-05	0	0	0	1	0	0	0	0	0	0	0	0	0	0	0	0
2000-08-06	0	0	0	1	0	0	0	0	0	0	0	0	0	0	0	0
2000-08-07	0	0	0	1	0	0	0	0	0	0	0	0	0	0	0	0
2000-08-08	0	0	0	1	0	0	0	0	0	0	0	0	0	0	0	0
2000-08-09	0	0	0	1	0	0	0	0	0	0	0	0	0	0	0	0
2000-08-10	0	0	0	1	0	0	0	0	0	0	0	0	0	0	0	0
2000-08-11	0	0	0	1	0	0	0	0	0	0	0	0	0	0	0	0
2000-08-12	0	0	0	1	0	0	0	0	0	0	0	0	0	0	0	0
2000-08-13	0	0	0	1	0	0	0	0	0	0	0	0	0	0	0	0
2000-08-14	0	0	0	1	0	0	0	0	0	0	0	0	0	0	0	0
2000-08-15	0	0	0	1	0	0	0	0	0	0	0	0	0	0	0	0
2000-08-16	0	0	0	1	0	0	0	0	0	0	0	0	0	0	0	0
2000-08-17	0	0	0	1	0	0	0	0	0	0	0	0	0	0	0	0
2000-08-18	0	0	0	1	0	0	0	0	0	0	0	0	0	0	0	0
2000-08-19	0	0	0	1	0	0	0	0	0	0	0	0	0	0	0	0
2000-08-20	0	0	0	1	0	0	0	0	0	0	0	0	0	0	0	0
2000-08-21	0	0	0	1	0	0	0	0	0	0	0	0	0	0	0	0
2000-08-22	0	0	0	1	0	0	0	0	0	0	0	0	0	0	0	0
2000-08-23	0	0	0	1	0	0	0	0	0	0	0	0	0	0	0	0
2000-08-24	0	0	0	1	0	0	0	0	0	0	0	0	0	0	0	0
2000-08-25	0	0	0	1	0	0	0	0	0	0	0	0	0	0	0	0
2000-08-26	0	0	0	1	0	0	0	0	0	0	0	0	0	0	0	0
2000-08-27	0	0	0	1	0	0	0	0	0	0	0	0	0	0	0	0
2000-08-28	0	0	0	1	0	0	0	0	0	0	0	0	0	0	0	0
2000-08-29	0	0	0	1	0	0	0	0	0	0	0	0	0	0	0	0
2000-08-30	0	0	0	1	0	0	0	0	0	0	0	0	0	0	0	0
2000-08-31	0	0	0	1	0	0	0	0	0	0	0	0	0	0	0	0
2000-09-01	0	0	0	1	0	0	0	0	0	0	0	0	0	0	0	0
2000-09-02	0	0	0	1	0	0	0	0	0	0	0	0	0	0	0	0
2000-09-03	0	0	0	1	0	0	0	0	0	0	0	0	0	0	0	0
2000-09-04	0	0	0	1	0	0	0	0	0	0	0	0	0	0	0	0
2000-09-05	0	0	1	1	0	0	0	0	0	0	0	0	0	0	0	0
2000-09-06	1	0	1	1	0	0	0	0	0	0	0	0	0	0	0	0
2000-09-07	1	0	1	1	0	0	0	0	0	0	0	0	0	0	0	0
2000-09-08	1	0	1	1	0	0	0	0	0	0	0	0	0	0	0	0
2000-09-09	1	0	1	1	0	0	0	0	0	0	0	0	0	0	0	0
2000-09-10	1	0	1	1	0	0	0	0	0	0	0	0	0	0	0	0
2000-09-11	1	0	1	1	0	0	0	0	0	0	0	0	0	0	0	0
2000-09-12	1	0	1	1	0	0	0	0	0	0	0	0	0	0	0	0
2000-09-13	1	0	1	1	0	0	0	0	0	0	0	0	0	0	0	0
2000-09-14	1	0	1	1	0	0	0	0	0	0	0	0	0	0	0	0
2000-09-15	1	0	1	1	0	0	0	0	0	0	0	0	0	0	0	0
2000-09-16	1	0	1	1	0	0	0	0	0	0	0	0	0	0	0	0
2000-09-17	1	0	1	1	0	0	0	0	0	0	0	0	0	0	0	0
2000-09-18	1	0	1	1	0	0	0	0	0	0	0	0	0	0	0	0
2000-09-19	1	0	1	1	0	0	0	0	0	0	0	0	0	0	0	0
2000-09-20	1	0	1	1	0	0	0	0	0	0	0	0	0	0	0	0
2000-09-21	1	0	1	1	0	0	0	0	0	0	0	0	0	0	0	0
2000-09-22	1	0	1	1	0	0	0	0	0	0	0	0	0	0	0	0
2000-09-23	1	0	1	1	0	0	0	0	0	0	0	0	0	0	0	0
2000-09-24	1	0	1	1	0	0	0	0	0	0	0	0	0	0	0	0
2000-09-25	1	0	1	1	0	0	0	0	0	0	0	0	0	0	0	0
2000-09-26	1	0	1	1	0	0	0	0	0	0	0	0	0	0	0	0
2000-09-27	1	0	1	1	0	0	0	0	0	0	0	0	0	0	0	0
2000-09-28	1	0	1	1	0	0	0	0	0	0	0	0	0	0	0	0
2000-09-29	1	0	1	1	0	0	0	0	0	0	0	0	0	0	0	0
2000-09-30	1	0	1	1	0	0	0	0	0	0	0	0	0	0	0	0
2000-10-01	1	0	1	1	0	0	0	0	0	0	0	0	0	0	0	0
2000-10-02	1	0	1	1	0	0	0	0	0	0	0	0	0	0	0	0
2000-10-03	1	0	1	1	0	0	0	0	0	0	0	0	0	0	0	0
2000-10-04	1	0	1	1	0	0	0	0	0	0	0	0	0	0	0	0
2000-10-05	1	0	1	1	0	0	0	0	0	0	0	0	0	0	0	0
2000-10-06	1	0	1	1	0	0	0	0	0	0	0	0	0	0	0	0
2000-10-07	1	0	1	1	0	0	0	0	0	0	0	0	0	0	0	0
2000-10-08	1	0	1	1	0	0	0	0	0	0	0	0	0	0	0	0
2000-10-09	1	0	1	1	0	0	0	0	0	0	0	0	0	0	0	0
2000-10-10	1	0	1	1	0	0	0	0	0	0	0	0	0	0	0	0
2000-10-11	1	0	1	1	0	0	0	0	0	0	0	0	0	0	0	0
2000-10-12	1	0	1	1	0	0	0	0	0	0	0	0	0	0	0	0
2000-10-13	1	0	1	1	0	0	0	0	0	0	0	0	0	0	0	0
2000-10-14	1	0	1	1	0	0	0	0	0	0	0	0	0	0	0	0
2000-10-15	1	0	1	1	0	0	0	0	0	0	0	0	0	0	0	0
2000-10-16	1	0	1	1	0	0	0	0	0	0	0	0	0	0	0	0
2000-10-17	1	0	1	1	0	0	0	0	0	0	0	0	0	0	0	0
2000-10-18	1	0	1	1	0	0	0	0	0	0	0	0	0	0	0	0
2000-10-19	1	0	1	1	0	0	0	0	0	0	0	0	0	0	0	0
2000-10-20	1	0	1	1	0	0	0	0	0	0	0	0	0	0	0	0
2000-10-21	1	0	1	1	0	0	0	0	0	0	0	0	0	0	0	0
2000-10-22	1	0	1	1	0	0	0	0	0	0	0	0	0	0	0	0
2000-10-23	1	0	1	1	0	0	0	0	0	0	0	0	0	0	0	0
2000-10-24	1	0	1	1	0	0	0	0	0	0	0	0	0	0	0	0
2000-10-25	1	0	1	1	0	0	0	0	0	0	0	0	0	0	0	0
2000-10-26	1	0	1	1	0	0	0	0	0	0	0	0	0	0	0	0
2000-10-27	1	0	1	1	0	0	0	0	0	0	0	0	0	0	0	0
2000-10-28	1	0	1	1	0	0	0	0	0	0	0	0	0	0	0	0
2000-10-29	1	0	1	1	0	0	0	0	0	0	0	0	0	0	0	0
2000-10-30	1	0	1	1	0	0	0	0	0	0	0	0	0	0	0	0
2000-10-31	1	0	1	1	0	0	0	0	0	0	0	0	0	0	0	0
2000-11-01	1	0	1	1	0	0	0	0	0	0	0	0	0	0	0	0
2000-11-02	1	0	1	1	0	0	0	0	0	0	0	0	0	0	0	0
2000-11-03	1	0	1	1	0	0	0	0	0	0	0	0	0	0	0	0
2000-11-04	1	0	1	1	0	0	0	0	0	0	0	0	0	0	0	0
2000-11-05	1	0	1	1	0	0	0	0	0	0	0	0	0	0	0	0
2000-11-06	1	0	1	1	0	0	0	0	0	0	0	0	0	0	0	0
2000-11-07	1	0	1	1	0	0	0	0	0	0	0	0	0	0	0	0
2000-11-08	1	0	1	1	0	0	0	0	0	0	0	0	0	0	0	0
2000-11-09	1	0	1	1	0	0	0	0	0	0	0	0	0	0	0	0
2000-11-10	1	0	1	1	0	0	0	0	0	0	0	0	0	0	0	0
2000-11-11	1	0	1	1	0	0	0	0	0	0	0	0	0	0	0	0
2000-11-12	1	0	1	1	0	0	0	0	0	0	0	0	0	0	0	0
2000-11-13	1	0	1	1	0	0	0	0	0	0	0	0	0	0	0	0
2000-11-14	1	0	1	1	0	0	0	0	0	0	0	0	0	0	0	0
2000-11-15	1	0	1	1	0	0	0	0	0	0	0	0	0	0	0	0
2000-11-16	1	0	1	1	0	0	0	0	0	0	0	0	0	0	0	0
2000-11-17	1	0	1	1	0	0	0	0	0	0	0	0	0	0	0	0
2000-11-18	1	0	1	1	0	0	0	0	0	0	0	0	0	0	0	0
2000-11-19	1	0	1	1	0	0	0	0	0	0	0	0	0	0	0	0
2000-11-20	1	0	1	1	0	0	0	0	0	0	0	0	0	0	0	0
2000-11-21	1	0	1	1	0	0	0	0	0	0	0	0	0	0	0	0
2000-11-22	1	0	1	1	0	0	0	0	0	0	0	0	0	0	0	0
2000-11-23	1	0	1	1	0	0	0	0	0	0	0	0	0	0	0	0
2000-11-24	1	0	1	1	0	0	0	0	0	0	0	0	0	0	0	0
2000-11-25	1	0	1	1	0	0	0	0	0	0	0	0	0	0	0	0
2000-11-26	1	0	1	1	0	0	0	0	0	0	0	0	0	0	0	0
2000-11-27	1	0	1	1	0	0	0	0	0	0	0	0	0	0	0	0
2000-11-28	1	0	1	1	0	0	0	0	0	0	0	0	0	0	0	0
2000-11-29	1	0	1	1	0	0	0	0	0	0	0	0	0	0	0	0
2000-11-30	1	0	1	1	0	0	0	0	0	0	0	0	0	0	0	0
2000-12-01	1	0	1	1	0	0	0	0	0	0	0	0	0	0	0	0
2000-12-02	1	0	1	1	0	0	0	0	0	0	0	0	0	0	0	0
2000-12-03	1	0	1	1	0	0	0	0	0	0	0	0	0	0	0	0
2000-12-04	1	0	1	1	0	0	0	0	0	0	0	0	0	0	0	0
2000-12-05	1	0	1	1	0	0	0	0	0	0	0	0	0	0	0	0
2000-12-06	1	0	1	1	0	0	0	0	0	0	0	0	0	0	0	0
2000-12-07	1	0	1	1	0	0	0	0	0	0	0	0	0	0	0	0
2000-12-08	1	0	1	1	0	0	0	0	0	0	0	0	0	0	0	0
2000-12-09	1	0	1	1	0	0	0	0	0	0	0	0	0	0	0	0
2000-12-10	1	0	1	1	0	0	0	0	0	0	0	0	0	0	0	0
2000-12-11	1	0	1	1	0	0	0	0	0	0	0	0	0	0	0	0
2000-12-12	1	0	1	1	0	0	0	0	0	0	0	0	0	0	0	0
2000-12-13	1	0	1	1	0	0	0	0	0	0	0	0	0	0	0	0
2000-12-14	1	0	1	1	0	0	0	0	0	0	0	0	0	0	0	0
2000-12-15	1	0	1	1	0	0	0	0	0	0	0	0	0	0	0	0
2000-12-16	1	0	1	1	0	0	0	0	0	0	0	0	0	0	0	0
2000-12-17	1	0	1	1	0	0	0	0	0	0	0	0	0	0	0	0
2000-12-18	1	0	1	1	0	0	0	0	0	0	0	0	0	0	0	0
2000-12-19	1	0	1	1	0	0	0	0	0	0	0	0	0	0	0	0
2000-12-20	1	0	1	1	0	0	0	0	0	0	0	0	0	0	0	0
2000-12-21	1	0	1	1	0	0	0	0	0	0	0	0	0	0	0	0
2000-12-22	1	0	1	1	0	0	0	0	0	0	0	0	0	0	0	0
2000-12-23	1	0	1	1	0	0	0	0	0	0	0	0	0	0	0	0
2000-12-24	1	0	1	1	0	0	0	0	0	0	0	0	0	0	0	0
2000-12-25	1	0	1	1	0	0	0	0	0	0	0	0	0	0	0	0
2000-12-26	1	0	1	1	0	0	0	0	0	0	0	0	0	0	0	0
2000-12-27	1	0	1	1	0	0	0	0	0	0	0	0	0	0	0	0
2000-12-28	1	0	1	1	0	0	0	0	0	0	0	0	0	0	0	0
2000-12-29	1	0	1	1	0	0	0	0	0	0	0	0	0	0	0	0
2000-12-30	1	0	1	1	0	0	0	0	0	0	0	0	0	0	0	0
2000-12-31	1	0	1	1	0	0	0	0	0	0	0	0	0	0	0	0
2001-01-01	1	0	1	1	0	0	0	0	0	0	0	0	0	0	0	0
2001-01-02	1	0	1	1	0	0	0	0	0	0	0	0	0	0	0	0
2001-01-03	1	0	1	1	0	0	0	0	0	0	0	0	0	0	0	0
2001-01-04	1	0	1	1	0	0	0	0	0	0	0	0	0	0	0	0
2001-01-05	1	0	1	1	0	0	0	0	0	0	0	0	0	0	0	0
2001-01-06	1	0	1	1	0	0	0	0	0	0	0	0	0	0	0	0
2001-01-07	1	0	1	1	0	0	0	0	0	0	0	0	0	0	0	0
2001-01-08	1	0	1	1	0	0	0	0	0	0	0	0	0	0	0	0
2001-01-09	1	0	1	1	0	0	0	0	0	0	0	0	0	0	0	0
2001-01-10	1	0	1	1	0	0	0	0	0	0	0	0	0	0	0	0
2001-01-11	1	0	1	1	0	0	0	0	0	0	0	0	0	0	0	0
2001-01-12	1	0	1	1	0	0	0	0	0	0	0	0	0	0	0	0
2001-01-13	1	0	1	1	0	0	0	0	0	0	0	0	0	0	0	0
2001-01-14	1	0	1	1	0	0	0	0	0	0	0	0	0	0	0	0
2001-01-15	1	0	1	1	0	0	0	0	0	0	0	0	0	0	0	0
2001-01-16	1	0	1	1	0	0	0	0	0	0	0	0	0	0	0	0
2001-01-17	1	0	1	1	0	0	0	0	0	0	0	0	0	0	0	0
2001-01-18	1	0	1	1	0	0	0	0	0	0	0	0	0	0	0	0
2001-01-19	1	0	1	1	0	0	0	0	0	0	0	0	0	0	0	0
2001-01-20	1	0	1	1	0	0	0	0	0	0	0	0	0	0	0	0
2001-01-21	1	0	1	1	0	0	0	0	0	0	0	0	0	0	0	0
2001-01-22	1	0	1	1	0	0	0	0	0	0	0	0	0	0	0	0
2001-01-23	1	0	1	1	0	0	0	0	0	0	0	0	0	0	0	0
2001-01-24	1	0	1	1	0	0	0	0	0	0	0	0	0	0	0	0
2001-01-25	1	0	1	1	0	0	0	0	0	0	0	0	0	0	0	0
2001-01-26	1	1	1	1	0	0	0	0	0	0	0	0	0	0	0	0
2001-01-27	1	1	1	1	0	0	0	0	0	0	0	0	0	0	0	0
2001-01-28	1	1	1	1	0	0	0	0	0	0	0	0	0	0	0	0
2001-01-29	1	1	1	1	0	0	0	0	0	0	0	0	0	0	0	0
2001-01-30	1	1	1	1	0	0	0	0	0	0	0	0	0	0	0	0
2001-01-31	1	1	1	1	0	0	0	0	0	0	0	0	0	0	0	0
2001-02-01	1	1	1	1	0	0	0	0	0	0	0	0	0	0	0	0
2001-02-02	1	1	1	1	0	0	0	0	0	0	0	0	0	0	0	0
2001-02-03	1	1	1	1	0	0	0	0	0	0	0	0	0	0	0	0
2001-02-04	1	1	1	1	0	0	0	0	0	0	0	0	0	0	0	0
2001-02-05	1	1	1	1	0	0	0	0	0	0	0	0	0	0	0	0
2001-02-06	1	1	1	1	0	0	0	0	0	0	0	0	0	0	0	0
2001-02-07	1	1	1	1	0	0	0	0	0	0	0	0	0	0	0	0
2001-02-08	1	1	1	0	0	0	0	0	0	0	0	0	0	0	0	0
2001-02-09	1	1	1	1	0	0	0	0	0	0	0	0	0	0	0	0
2001-02-10	1	1	1	1	0	0	0	0	0	0	0	0	0	0	0	0
2001-02-11	1	1	1	1	0	0	0	0	0	0	0	0	0	0	0	0
2001-02-12	1	1	1	1	0	0	0	0	0	0	0	0	0	0	0	0
2001-02-13	1	1	1	1	0	0	0	0	0	0	0	0	0	0	0	0
2001-02-14	1	1	1	1	0	0	0	0	0	0	0	0	0	0	0	0
2001-02-15	1	1	1	1	0	0	0	0	0	0	0	0	0	0	0	0
2001-02-16	1	1	1	1	0	0	0	0	0	0	0	0	0	0	0	0
2001-02-17	1	1	1	1	0	0	0	0	0	0	0	0	0	0	0	0
2001-02-18	1	1	1	1	0	0	0	0	0	0	0	0	0	0	0	0
2001-02-19	1	1	1	1	0	0	0	0	0	0	0	0	0	0	0	0
2001-02-20	1	1	1	1	0	0	0	0	0	0	0	0	0	0	0	0
2001-02-21	1	1	1	1	0	0	0	0	0	0	0	0	0	0	0	0
2001-02-22	1	0	1	1	0	0	0	0	0	0	0	0	0	0	0	0
2001-02-23	1	1	1	1	0	0	0	0	0	0	0	0	0	0	0	0
2001-02-24	1	1	1	1	0	0	0	0	0	0	0	0	0	0	0	0
2001-02-25	1	1	1	1	0	0	0	0	0	0	0	0	0	0	0	0
2001-02-26	1	1	1	1	0	0	0	0	0	0	0	0	0	0	0	0
2001-02-27	1	1	1	1	0	0	0	0	0	0	0	0	0	0	0	0
2001-02-28	1	1	1	1	0	0	0	0	0	0	0	0	0	0	0	0
2001-03-01	1	1	1	1	0	0	0	0	0	0	0	0	0	0	0	0
2001-03-02	1	1	1	1	0	0	0	0	0	0	0	0	0	0	0	0
2001-03-03	1	1	1	1	0	0	0	0	0	0	0	0	0	0	0	0
2001-03-04	1	1	1	1	0	0	0	0	0	0	0	0	0	0	0	0
2001-03-05	1	1	1	1	0	0	0	0	0	0	0	0	0	0	0	0
2001-03-06	1	1	1	1	0	0	0	0	0	0	0	0	0	0	0	0
2001-03-07	0	0	1	1	0	0	0	0	0	0	0	0	0	0	0	0
2001-03-08	0	1	1	1	0	0	0	0	0	0	0	0	0	0	0	0
2001-03-09	0	1	1	1	0	0	0	0	0	0	0	0	0	0	0	0
2001-03-10	0	1	1	1	0	0	0	0	0	0	0	0	0	0	0	0
2001-03-11	0	1	1	1	0	0	0	0	0	0	0	0	0	0	0	0
2001-03-12	1	1	1	1	0	0	0	0	0	0	0	0	0	0	0	0
2001-03-13	1	1	1	1	0	0	0	0	0	0	0	0	0	0	0	0
2001-03-14	1	1	1	1	0	0	0	0	0	0	0	0	0	0	0	0
2001-03-15	1	1	1	1	0	0	0	0	0	0	0	0	0	0	0	0
2001-03-16	1	1	1	1	0	0	0	0	0	0	0	0	0	0	0	0
2001-03-17	1	1	1	1	0	0	0	0	0	0	0	0	0	0	0	0
2001-03-18	1	1	1	1	0	0	0	0	0	0	0	0	0	0	0	0
2001-03-19	1	1	1	1	0	0	0	0	0	0	0	0	0	0	0	0
2001-03-20	1	1	1	1	0	0	0	0	0	0	0	0	0	0	0	0
2001-03-21	1	1	1	1	0	0	0	0	0	0	0	0	0	0	0	0
2001-03-22	1	1	1	1	0	0	0	0	0	0	0	0	0	0	0	0
2001-03-23	1	1	1	1	0	0	0	0	0	0	0	0	0	0	0	0
2001-03-24	1	1	1	1	0	0	0	0	0	0	0	0	0	0	0	0
2001-03-25	1	1	1	1	0	0	0	0	0	0	0	0	0	0	0	0
2001-03-26	1	1	1	1	0	0	0	0	0	0	0	0	0	0	0	0
2001-03-27	1	1	1	1	0	0	0	0	0	0	0	0	0	0	0	0
2001-03-28	1	1	1	1	0	0	0	0	0	0	0	0	0	0	0	0
2001-03-29	1	1	1	1	0	0	0	0	0	0	0	0	0	0	0	0
2001-03-30	1	1	1	1	0	0	0	0	0	0	0	0	0	0	0	0
2001-03-31	1	1	1	1	0	0	0	0	0	0	0	0	0	0	0	0
2001-04-01	1	1	1	1	0	0	0	0	0	0	0	0	0	0	0	0
2001-04-02	1	1	1	1	0	0	0	0	0	0	0	0	0	0	0	0
2001-04-03	1	1	1	1	0	0	0	0	0	0	0	0	0	0	0	0
2001-04-04	1	1	1	1	0	0	0	0	0	0	0	0	0	0	0	0
2001-04-05	1	1	1	1	0	0	0	0	0	0	0	0	0	0	0	0
2001-04-06	1	1	1	1	0	0	0	0	0	0	0	0	0	0	0	0
2001-04-07	1	1	1	1	0	0	0	0	0	0	0	0	0	0	0	0
2001-04-08	1	1	1	1	0	0	0	0	0	0	0	0	0	0	0	0
2001-04-09	1	1	1	1	0	0	0	0	0	0	0	0	0	0	0	0
2001-04-10	1	1	1	1	0	0	0	0	0	0	0	0	0	0	0	0
2001-04-11	1	1	1	1	0	0	0	0	0	0	0	0	0	0	0	0
2001-04-12	1	0	1	1	0	0	0	0	0	0	0	0	0	0	0	0
2001-04-13	1	1	1	1	0	0	0	0	0	0	0	0	0	0	0	0
2001-04-14	1	1	1	1	0	0	0	0	0	0	0	0	0	0	0	0
2001-04-15	1	1	1	1	0	0	0	0	0	0	0	0	0	0	0	0
2001-04-16	1	1	1	1	0	0	0	0	0	0	0	0	0	0	0	0
2001-04-17	1	1	1	1	0	0	0	0	0	0	0	0	0	0	0	0
2001-04-18	1	1	1	1	0	0	0	0	0	0	0	0	0	0	0	0
2001-04-19	1	1	1	1	0	0	0	0	0	0	0	0	0	0	0	0
2001-04-20	1	1	1	1	0	0	0	0	0	0	0	0	0	0	0	0
2001-04-21	1	1	1	1	0	0	0	0	0	0	0	0	0	0	0	0
2001-04-22	1	1	1	1	0	0	0	0	0	0	0	0	0	0	0	0
2001-04-23	1	1	1	1	0	0	0	0	0	0	0	0	0	0	0	0
2001-04-24	1	1	1	1	0	0	0	0	0	0	0	0	0	0	0	0
2001-04-25	1	1	1	1	0	0	0	0	0	0	0	0	0	0	0	0
2001-04-26	1	1	1	1	0	0	0	0	0	0	0	0	0	0	0	0
2001-04-27	1	1	1	1	0	0	0	0	0	0	0	0	0	0	0	0
2001-04-28	1	1	1	1	0	0	0	0	0	0	0	0	0	0	0	0
2001-04-29	1	1	1	1	0	0	0	0	0	0	0	0	0	0	0	0
2001-04-30	1	1	1	1	0	0	0	0	0	0	0	0	0	0	0	0
2001-05-01	1	1	1	1	0	0	0	0	0	0	0	0	0	0	0	0
2001-05-02	1	1	1	1	0	0	0	0	0	0	0	0	0	0	0	0
2001-05-03	1	1	1	1	0	0	0	0	0	0	0	0	0	0	0	0
2001-05-04	1	1	1	1	0	0	0	0	0	0	0	0	0	0	0	0
2001-05-05	1	1	1	1	0	0	0	0	0	0	0	0	0	0	0	0
2001-05-06	1	1	1	1	0	0	0	0	0	0	0	0	0	0	0	0
2001-05-07	1	1	1	1	0	0	0	0	0	0	0	0	0	0	0	0
2001-05-08	1	1	1	1	0	0	0	0	0	0	0	0	0	0	0	0
2001-05-09	1	1	1	1	0	0	0	0	0	0	0	0	0	0	0	0
2001-05-10	1	1	1	1	0	0	0	0	0	0	0	0	0	0	0	0
2001-05-11	1	1	1	1	0	0	0	0	0	0	0	0	0	0	0	0
2001-05-12	1	1	1	1	0	0	0	0	0	0	0	0	0	0	0	0
2001-05-13	1	1	1	1	0	0	0	0	0	0	0	0	0	0	0	0
2001-05-14	1	1	1	1	0	0	0	0	0	0	0	0	0	0	0	0
2001-05-15	1	1	1	1	0	0	0	0	0	0	0	0	0	0	0	0
2001-05-16	1	1	1	1	0	0	0	0	0	0	0	0	0	0	0	0
2001-05-17	1	1	1	1	0	0	0	0	0	0	0	0	0	0	0	0
2001-05-18	0	1	1	1	0	0	0	0	0	0	0	0	0	0	0	0
2001-05-19	1	1	1	0	0	0	0	0	0	0	0	0	0	0	0	0
2001-05-20	1	1	1	0	0	0	0	0	0	0	0	0	0	0	0	0
2001-05-21	1	1	1	0	0	0	0	0	0	0	0	0	0	0	0	0
2001-05-22	1	1	1	0	0	0	0	0	0	0	0	0	0	0	0	0
2001-05-23	1	1	1	0	0	0	0	0	0	0	0	0	0	0	0	0
2001-05-24	1	1	1	0	0	0	0	0	0	0	0	0	0	0	0	0
2001-05-25	1	1	1	0	0	0	0	0	0	0	0	0	0	0	0	0
2001-05-26	1	1	1	0	0	0	0	0	0	0	0	0	0	0	0	0
2001-05-27	1	1	1	0	0	0	0	0	0	0	0	0	0	0	0	0
2001-05-28	1	1	1	0	0	0	0	0	0	0	0	0	0	0	0	0
2001-05-29	1	1	1	0	0	0	0	0	0	0	0	0	0	0	0	0
2001-05-30	1	1	1	1	0	0	0	0	0	0	0	0	0	0	0	0
2001-05-31	1	1	1	1	0	0	0	0	0	0	0	0	0	0	0	0
2001-06-01	1	1	1	1	0	0	0	0	0	0	0	0	0	0	0	0
2001-06-02	1	1	1	1	0	0	0	0	0	0	0	0	0	0	0	0
2001-06-03	1	1	1	1	0	0	0	0	0	0	0	0	0	0	0	0
2001-06-04	1	1	1	1	0	0	0	0	0	0	0	0	0	0	0	0
2001-06-05	1	1	1	1	0	0	0	0	0	0	0	0	0	0	0	0
2001-06-06	1	1	1	1	0	0	0	0	0	0	0	0	0	0	0	0
2001-06-07	1	1	1	1	0	0	0	0	0	0	0	0	0	0	0	0
2001-06-08	1	1	1	1	0	0	0	0	0	0	0	0	0	0	0	0
2001-06-09	1	1	1	1	0	0	0	0	0	0	0	0	0	0	0	0
2001-06-10	1	1	1	1	0	0	0	0	0	0	0	0	0	0	0	0
2001-06-11	1	1	1	1	0	0	0	0	0	0	0	0	0	0	0	0
2001-06-12	1	1	1	1	0	0	0	0	0	0	0	0	0	0	0	0
2001-06-13	1	1	1	1	0	0	0	0	0	0	0	0	0	0	0	0
2001-06-14	1	1	1	1	0	0	0	0	0	0	0	0	0	0	0	0
2001-06-15	1	1	1	1	0	0	0	0	0	0	0	0	0	0	0	0
2001-06-16	1	1	1	1	0	0	0	0	0	0	0	0	0	0	0	0
2001-06-17	1	1	1	1	0	0	0	0	0	0	0	0	0	0	0	0
2001-06-18	1	1	1	1	0	0	0	0	0	0	0	0	0	0	0	0
2001-06-19	1	1	0	1	0	0	0	0	0	0	0	0	0	0	0	0
2001-06-20	1	1	1	1	0	0	0	0	0	0	0	0	0	0	0	0
2001-06-21	1	1	1	1	0	0	0	0	0	0	0	0	0	0	0	0
2001-06-22	1	1	1	1	0	0	0	0	0	0	0	0	0	0	0	0
2001-06-23	1	1	1	1	0	0	0	0	0	0	0	0	0	0	0	0
2001-06-24	1	1	1	1	0	0	0	0	0	0	0	0	0	0	0	0
2001-06-25	1	1	1	1	0	0	0	0	0	0	0	0	0	0	0	0
2001-06-26	1	1	1	1	0	0	0	0	0	0	0	0	0	0	0	0
2001-06-27	1	1	1	1	0	0	0	0	0	0	0	0	0	0	0	0
2001-06-28	1	1	1	1	0	0	0	0	0	0	0	0	0	0	0	0
2001-06-29	1	1	1	1	0	0	0	0	0	0	0	0	0	0	0	0
2001-06-30	1	1	1	1	0	0	0	0	0	0	0	0	0	0	0	0
2001-07-01	1	1	1	1	0	0	0	0	0	0	0	0	0	0	0	0
2001-07-02	1	1	1	1	0	0	0	0	0	0	0	0	0	0	0	0
2001-07-03	1	1	1	1	0	0	0	0	0	0	0	0	0	0	0	0
2001-07-04	1	1	1	1	0	0	0	0	0	0	0	0	0	0	0	0
2001-07-05	1	1	1	1	0	0	0	0	0	0	0	0	0	0	0	0
2001-07-06	1	1	1	1	0	0	0	0	0	0	0	0	0	0	0	0
2001-07-07	1	1	1	1	0	0	0	0	0	0	0	0	0	0	0	0
2001-07-08	1	1	1	1	0	0	0	0	0	0	0	0	0	0	0	0
2001-07-09	1	1	1	1	0	0	0	0	0	0	0	0	0	0	0	0
2001-07-10	1	1	1	1	0	0	0	0	0	0	0	0	0	0	0	0
2001-07-11	1	1	1	1	0	0	0	0	0	0	0	0	0	0	0	0
2001-07-12	1	1	1	1	0	0	0	0	0	0	0	0	0	0	0	0
2001-07-13	1	1	1	1	0	0	0	0	0	0	0	0	0	0	0	0
2001-07-14	1	1	1	1	0	0	0	0	0	0	0	0	0	0	0	0
2001-07-15	1	1	1	1	0	0	0	0	0	0	0	0	0	0	0	0
2001-07-16	1	1	1	1	0	0	0	0	0	0	0	0	0	0	0	0
2001-07-17	1	1	1	1	0	0	0	0	0	0	0	0	0	0	0	0
2001-07-18	1	1	1	1	0	0	0	0	0	0	0	0	0	0	0	0
2001-07-19	1	1	1	1	0	0	0	0	0	0	0	0	0	0	0	0
2001-07-20	1	1	1	1	0	0	0	0	0	0	0	0	0	0	0	0
2001-07-21	1	1	1	1	0	0	0	0	0	0	0	0	0	0	0	0
2001-07-22	1	1	1	1	0	0	0	0	0	0	0	0	0	0	0	0
2001-07-23	1	1	1	1	0	0	0	0	0	0	0	0	0	0	0	0
2001-07-24	1	1	1	1	0	0	0	0	0	0	0	0	0	0	0	0
2001-07-25	1	1	1	1	0	0	0	0	0	0	0	0	0	0	0	0
2001-07-26	1	1	1	1	0	0	0	0	0	0	0	0	0	0	0	0
2001-07-27	1	1	1	1	0	0	0	0	0	0	0	0	0	0	0	0
2001-07-28	1	1	1	1	0	0	0	0	0	0	0	0	0	0	0	0
2001-07-29	1	1	1	1	0	0	0	0	0	0	0	0	0	0	0	0
2001-07-30	1	1	1	1	0	0	0	0	0	0	0	0	0	0	0	0
2001-07-31	1	1	1	1	0	0	0	0	0	0	0	0	0	0	0	0
2001-08-01	1	1	1	1	0	0	0	0	0	0	0	0	0	0	0	0
2001-08-02	1	1	1	1	0	0	0	0	0	0	0	0	0	0	0	0
2001-08-03	1	1	1	1	0	0	0	0	0	0	0	0	0	0	0	0
2001-08-04	1	1	1	1	0	0	0	0	0	0	0	0	0	0	0	0
2001-08-05	1	1	1	1	0	0	0	0	0	0	0	0	0	0	0	0
2001-08-06	1	1	1	1	0	0	0	0	0	0	0	0	0	0	0	0
2001-08-07	1	1	1	1	0	0	0	0	0	0	0	0	0	0	0	0
2001-08-08	1	1	1	1	0	0	0	0	0	0	0	0	0	0	0	0
2001-08-09	1	1	1	1	0	0	0	0	0	0	0	0	0	0	0	0
2001-08-10	1	1	1	1	0	0	0	0	0	0	0	0	0	0	0	0
2001-08-11	1	1	1	1	0	0	0	0	0	0	0	0	0	0	0	0
2001-08-12	1	1	1	1	0	0	0	0	0	0	0	0	0	0	0	0
2001-08-13	1	1	1	1	0	0	0	0	0	0	0	0	0	0	0	0
2001-08-14	1	1	1	1	0	0	0	0	0	0	0	0	0	0	0	0
2001-08-15	1	1	1	1	0	0	0	0	0	0	0	0	0	0	0	0
2001-08-16	1	1	1	1	0	0	0	0	0	0	0	0	0	0	0	0
2001-08-17	1	1	1	1	0	0	0	0	0	0	0	0	0	0	0	0
2001-08-18	1	1	1	1	0	0	0	0	0	0	0	0	0	0	0	0
2001-08-19	1	1	1	1	0	0	0	0	0	0	0	0	0	0	0	0
2001-08-20	1	1	1	1	0	0	0	0	0	0	0	0	0	0	0	0
2001-08-21	1	1	1	1	0	0	0	0	0	0	0	0	0	0	0	0
2001-08-22	1	1	1	1	0	0	0	0	0	0	0	0	0	0	0	0
2001-08-23	1	1	1	1	0	0	0	0	0	0	0	0	0	0	0	0
2001-08-24	1	1	1	1	0	0	0	0	0	0	0	0	0	0	0	0
2001-08-25	1	1	1	1	0	0	0	0	0	0	0	0	0	0	0	0
2001-08-26	1	1	1	1	0	0	0	0	0	0	0	0	0	0	0	0
2001-08-27	1	1	1	1	0	0	0	0	0	0	0	0	0	0	0	0
2001-08-28	1	1	1	1	0	0	0	0	0	0	0	0	0	0	0	0
2001-08-29	1	1	1	1	0	0	0	0	0	0	0	0	0	0	0	0
2001-08-30	1	1	0	1	0	0	0	0	0	0	0	0	0	0	0	0
2001-08-31	1	1	1	1	0	0	0	0	0	0	0	0	0	0	0	0
2001-09-01	1	1	1	1	0	0	0	0	0	0	0	0	0	0	0	0
2001-09-02	1	1	1	1	0	0	0	0	0	0	0	0	0	0	0	0
2001-09-03	1	1	1	1	0	0	0	0	0	0	0	0	0	0	0	0
2001-09-04	1	1	1	1	0	0	0	0	0	0	0	0	0	0	0	0
2001-09-05	1	1	1	1	0	0	0	0	0	0	0	0	0	0	0	0
2001-09-06	1	1	0	1	0	0	0	0	0	0	0	0	0	0	0	0
2001-09-07	1	1	1	1	0	0	0	0	0	0	0	0	0	0	0	0
2001-09-08	1	1	1	1	0	0	0	0	0	0	0	0	0	0	0	0
2001-09-09	1	1	1	1	0	0	0	0	0	0	0	0	0	0	0	0
2001-09-10	1	1	1	1	0	0	0	0	0	0	0	0	0	0	0	0
2001-09-11	1	1	1	1	0	0	0	0	0	0	0	0	0	0	0	0
2001-09-12	1	1	1	1	0	0	0	0	0	0	0	0	0	0	0	0
2001-09-13	1	1	1	1	0	0	0	0	0	0	0	0	0	0	0	0
2001-09-14	1	1	1	1	0	0	0	0	0	0	0	0	0	0	0	0
2001-09-15	1	1	1	1	0	0	0	0	0	0	0	0	0	0	0	0
2001-09-16	1	1	1	1	0	0	0	0	0	0	0	0	0	0	0	0
2001-09-17	1	1	1	1	0	0	0	0	0	0	0	0	0	0	0	0
2001-09-18	1	1	1	1	0	0	0	0	0	0	0	0	0	0	0	0
2001-09-19	1	1	1	1	0	0	0	0	0	0	0	0	0	0	0	0
2001-09-20	1	1	1	1	0	0	0	0	0	0	0	0	0	0	0	0
2001-09-21	1	1	1	1	0	0	0	0	0	0	0	0	0	0	0	0
2001-09-22	1	1	1	1	0	0	0	0	0	0	0	0	0	0	0	0
2001-09-23	1	1	1	1	0	0	0	0	0	0	0	0	0	0	0	0
2001-09-24	1	1	1	1	0	0	0	0	0	0	0	0	0	0	0	0
2001-09-25	1	1	1	1	0	0	0	0	0	0	0	0	0	0	0	0
2001-09-26	1	1	1	1	0	0	0	0	0	0	0	0	0	0	0	0
2001-09-27	1	1	1	1	0	0	0	0	0	0	0	0	0	0	0	0
2001-09-28	1	1	1	1	0	0	0	0	0	0	0	0	0	0	0	0
2001-09-29	1	1	1	1	0	0	0	0	0	0	0	0	0	0	0	0
2001-09-30	1	1	1	1	0	0	0	0	0	0	0	0	0	0	0	0
2001-10-01	1	1	1	1	0	0	0	0	0	0	0	0	0	0	0	0
2001-10-02	1	1	1	1	0	0	0	0	0	0	0	0	0	0	0	0
2001-10-03	1	1	1	1	0	0	0	0	0	0	0	0	0	0	0	0
2001-10-04	1	1	1	1	0	0	0	0	0	0	0	0	0	0	0	0
2001-10-05	1	1	1	1	0	0	0	0	0	0	0	0	0	0	0	0
2001-10-06	1	1	1	1	0	0	0	0	0	0	0	0	0	0	0	0
2001-10-07	1	1	1	1	0	0	0	0	0	0	0	0	0	0	0	0
2001-10-08	1	1	1	1	0	0	0	0	0	0	0	0	0	0	0	0
2001-10-09	1	1	1	1	0	0	0	0	0	0	0	0	0	0	0	0
2001-10-10	1	1	1	1	0	0	0	0	0	0	0	0	0	0	0	0
2001-10-11	1	1	1	1	0	0	0	0	0	0	0	0	0	0	0	0
2001-10-12	1	1	1	1	0	0	0	0	0	0	0	0	0	0	0	0
2001-10-13	1	1	1	1	0	0	0	0	0	0	0	0	0	0	0	0
2001-10-14	1	1	1	1	0	0	0	0	0	0	0	0	0	0	0	0
2001-10-15	1	1	1	1	0	0	0	0	0	0	0	0	0	0	0	0
2001-10-16	1	1	1	1	0	0	0	0	0	0	0	0	0	0	0	0
2001-10-17	1	1	1	1	0	0	0	0	0	0	0	0	0	0	0	0
2001-10-18	1	1	1	1	0	0	0	0	0	0	0	0	0	0	0	0
2001-10-19	1	1	1	1	0	0	0	0	0	0	0	0	0	0	0	0
2001-10-20	1	1	1	1	0	0	0	0	0	0	0	0	0	0	0	0
2001-10-21	1	1	1	1	0	0	0	0	0	0	0	0	0	0	0	0
2001-10-22	1	1	1	1	0	0	0	0	0	0	0	0	0	0	0	0
2001-10-23	1	1	1	1	0	0	0	0	0	0	0	0	0	0	0	0
2001-10-24	1	1	1	1	0	0	0	0	0	0	0	0	0	0	0	0
2001-10-25	1	1	1	1	0	0	0	0	0	0	0	0	0	0	0	0
2001-10-26	1	1	1	1	0	0	0	0	0	0	0	0	0	0	0	0
2001-10-27	1	1	1	1	0	0	0	0	0	0	0	0	0	0	0	0
2001-10-28	1	1	1	1	0	0	0	0	0	0	0	0	0	0	0	0
2001-10-29	1	1	1	1	0	0	0	0	0	0	0	0	0	0	0	0
2001-10-30	1	1	1	1	0	0	0	0	0	0	0	0	0	0	0	0
2001-10-31	1	1	1	1	0	0	0	0	0	0	0	0	0	0	0	0
2001-11-01	1	1	1	1	0	0	0	0	0	0	0	0	0	0	0	0
2001-11-02	1	1	1	1	0	0	0	0	0	0	0	0	0	0	0	0
2001-11-03	1	1	1	1	0	0	0	0	0	0	0	0	0	0	0	0
2001-11-04	1	1	1	1	0	0	0	0	0	0	0	0	0	0	0	0
2001-11-05	1	1	1	1	0	0	0	0	0	0	0	0	0	0	0	0
2001-11-06	1	1	1	1	0	0	0	0	0	0	0	0	0	0	0	0
2001-11-07	1	1	1	1	0	0	0	0	0	0	0	0	0	0	0	0
2001-11-08	1	1	1	1	0	0	0	0	0	0	0	0	0	0	0	0
2001-11-09	1	1	1	1	0	0	0	0	0	0	0	0	0	0	0	0
2001-11-10	1	1	1	1	0	0	0	0	0	0	0	0	0	0	0	0
2001-11-11	1	1	1	1	0	0	0	0	0	0	0	0	0	0	0	0
2001-11-12	1	1	1	1	0	0	0	0	0	0	0	0	0	0	0	0
2001-11-13	1	1	1	1	0	0	0	0	0	0	0	0	0	0	0	0
2001-11-14	1	1	1	1	0	0	0	0	0	0	0	0	0	0	0	0
2001-11-15	1	1	1	1	0	0	0	0	0	0	0	0	0	0	0	0
2001-11-16	1	1	1	1	0	0	0	0	0	0	0	0	0	0	0	0
2001-11-17	1	1	1	1	0	0	0	0	0	0	0	0	0	0	0	0
2001-11-18	1	1	1	1	0	0	0	0	0	0	0	0	0	0	0	0
2001-11-19	1	1	1	1	0	0	0	0	0	0	0	0	0	0	0	0
2001-11-20	1	1	1	1	0	0	0	0	0	0	0	0	0	0	0	0
2001-11-21	1	1	1	1	0	0	0	0	0	0	0	0	0	0	0	0
2001-11-22	1	1	1	1	0	0	0	0	0	0	0	0	0	0	0	0
2001-11-23	1	1	1	1	0	0	0	0	0	0	0	0	0	0	0	0
2001-11-24	1	1	1	1	0	0	0	0	0	0	0	0	0	0	0	0
2001-11-25	1	1	1	1	0	0	0	0	0	0	0	0	0	0	0	0
2001-11-26	1	1	1	1	0	0	0	0	0	0	0	0	0	0	0	0
2001-11-27	1	1	1	1	0	0	0	0	0	0	0	0	0	0	0	0
2001-11-28	1	1	1	1	0	0	0	0	0	0	0	0	0	0	0	0
2001-11-29	1	1	1	1	0	0	0	0	0	0	0	0	0	0	0	0
2001-11-30	1	1	1	1	0	0	0	0	0	0	0	0	0	0	0	0
2001-12-01	1	1	1	1	0	0	0	0	0	0	0	0	0	0	0	0
2001-12-02	1	1	1	1	0	0	0	0	0	0	0	0	0	0	0	0
2001-12-03	1	1	1	1	0	0	0	0	0	0	0	0	0	0	0	0
2001-12-04	1	1	1	1	0	0	0	0	0	0	0	0	0	0	0	0
2001-12-05	1	1	1	1	0	0	0	0	0	0	0	0	0	0	0	0
2001-12-06	1	1	1	1	0	0	0	0	0	0	0	0	0	0	0	0
2001-12-07	1	1	1	1	0	0	0	0	0	0	0	0	0	0	0	0
2001-12-08	1	1	1	1	0	0	0	0	0	0	0	0	0	0	0	0
2001-12-09	1	1	1	1	0	0	0	0	0	0	0	0	0	0	0	0
2001-12-10	1	1	1	1	0	0	0	0	0	0	0	0	0	0	0	0
2001-12-11	1	1	1	1	0	0	0	0	0	0	0	0	0	0	0	0
2001-12-12	1	1	1	1	0	0	0	0	0	0	0	0	0	0	0	0
2001-12-13	1	1	1	1	0	0	0	0	0	0	0	0	0	0	0	0
2001-12-14	1	1	1	1	0	0	0	0	0	0	0	0	0	0	0	0
2001-12-15	1	1	1	1	0	0	0	0	0	0	0	0	0	0	0	0
2001-12-16	1	1	1	1	0	0	0	0	0	0	0	0	0	0	0	0
2001-12-17	1	1	1	1	0	0	0	0	0	0	0	0	0	0	0	0
2001-12-18	1	1	1	1	0	0	0	0	0	0	0	0	0	0	0	0
2001-12-19	1	1	1	1	0	0	0	0	0	0	0	0	0	0	0	0
2001-12-20	1	1	1	1	0	0	0	0	0	0	0	0	0	0	0	0
2001-12-21	1	1	1	1	0	0	0	0	0	0	0	0	0	0	0	0
2001-12-22	1	1	1	1	0	0	0	0	0	0	0	0	0	0	0	0
2001-12-23	1	1	1	1	0	0	0	0	0	0	0	0	0	0	0	0
2001-12-24	1	1	1	1	0	0	0	0	0	0	0	0	0	0	0	0
2001-12-25	1	1	1	1	0	0	0	0	0	0	0	0	0	0	0	0
2001-12-26	1	1	1	1	0	0	0	0	0	0	0	0	0	0	0	0
2001-12-27	1	1	1	1	0	0	0	0	0	0	0	0	0	0	0	0
2001-12-28	1	1	1	1	0	0	0	0	0	0	0	0	0	0	0	0
2001-12-29	1	1	1	1	0	0	0	0	0	0	0	0	0	0	0	0
2001-12-30	1	1	1	1	0	0	0	0	0	0	0	0	0	0	0	0
2001-12-31	1	1	1	1	0	0	0	0	0	0	0	0	0	0	0	0
2002-01-01	1	1	1	1	0	0	0	0	0	0	0	0	0	0	0	0
2002-01-02	1	1	1	1	0	0	0	0	0	0	0	0	0	0	0	0
2002-01-03	1	1	1	1	0	0	0	0	0	0	0	0	0	0	0	0
2002-01-04	1	1	1	1	0	0	0	0	0	0	0	0	0	0	0	0
2002-01-05	1	1	1	1	0	0	0	0	0	0	0	0	0	0	0	0
2002-01-06	1	1	1	1	0	0	0	0	0	0	0	0	0	0	0	0
2002-01-07	1	1	1	1	0	0	0	0	0	0	0	0	0	0	0	0
2002-01-08	1	1	1	1	0	0	0	0	0	0	0	0	0	0	0	0
2002-01-09	1	1	1	1	0	0	0	0	0	0	0	0	0	0	0	0
2002-01-10	1	1	1	1	0	0	0	0	0	0	0	0	0	0	0	0
2002-01-11	1	1	1	1	0	0	0	0	0	0	0	0	0	0	0	0
2002-01-12	1	1	1	1	0	0	0	0	0	0	0	0	0	0	0	0
2002-01-13	1	1	1	1	0	0	0	0	0	0	0	0	0	0	0	0
2002-01-14	1	1	1	1	0	0	0	0	0	0	0	0	0	0	0	0
2002-01-15	1	1	1	1	0	0	0	0	0	0	0	0	0	0	0	0
2002-01-16	1	1	1	1	0	0	0	0	0	0	0	0	0	0	0	0
2002-01-17	1	1	1	1	0	0	0	0	0	0	0	0	0	0	0	0
2002-01-18	1	1	1	1	0	0	0	0	0	0	0	0	0	0	0	0
2002-01-19	1	1	1	1	0	0	0	0	0	0	0	0	0	0	0	0
2002-01-20	1	1	1	1	0	0	0	0	0	0	0	0	0	0	0	0
2002-01-21	1	1	1	1	0	0	0	0	0	0	0	0	0	0	0	0
2002-01-22	1	1	1	1	0	0	0	0	0	0	0	0	0	0	0	0
2002-01-23	1	1	1	1	0	0	0	0	0	0	0	0	0	0	0	0
2002-01-24	1	1	1	1	0	0	0	0	0	0	0	0	0	0	0	0
2002-01-25	1	1	1	1	0	0	0	0	0	0	0	0	0	0	0	0
2002-01-26	1	1	1	1	0	0	0	0	0	0	0	0	0	0	0	0
2002-01-27	1	1	1	1	0	0	0	0	0	0	0	0	0	0	0	0
2002-01-28	1	1	1	1	0	0	0	0	0	0	0	0	0	0	0	0
2002-01-29	1	1	1	1	0	0	0	0	0	0	0	0	0	0	0	0
2002-01-30	1	1	1	1	0	0	0	0	0	0	0	0	0	0	0	0
2002-01-31	1	1	1	1	0	0	0	0	0	0	0	0	0	0	0	0
2002-02-01	1	1	1	1	0	0	0	0	0	0	0	0	0	0	0	0
2002-02-02	1	1	1	1	0	0	0	0	0	0	0	0	0	0	0	0
2002-02-03	1	1	1	1	0	0	0	0	0	0	0	0	0	0	0	0
2002-02-04	1	1	1	1	0	0	0	0	0	0	0	0	0	0	0	0
2002-02-05	1	1	1	1	0	0	0	0	0	0	0	0	0	0	0	0
2002-02-06	1	1	1	1	0	0	0	0	0	0	0	0	0	0	0	0
2002-02-07	1	1	1	1	0	0	0	0	0	0	0	0	0	0	0	0
2002-02-08	1	1	1	1	0	0	0	0	0	0	0	0	0	0	0	0
2002-02-09	1	1	1	1	0	0	0	0	0	0	0	0	0	0	0	0
2002-02-10	1	1	1	1	0	0	0	0	0	0	0	0	0	0	0	0
2002-02-11	1	1	1	1	0	0	0	0	0	0	0	0	0	0	0	0
2002-02-12	1	1	1	1	0	0	0	0	0	0	0	0	0	0	0	0
2002-02-13	1	1	1	1	0	0	0	0	0	0	0	0	0	0	0	0
2002-02-14	1	1	1	1	0	0	0	0	0	0	0	0	0	0	0	0
2002-02-15	1	1	1	1	0	0	0	0	0	0	0	0	0	0	0	0
2002-02-16	1	1	1	1	0	0	0	0	0	0	0	0	0	0	0	0
2002-02-17	1	1	1	1	0	0	0	0	0	0	0	0	0	0	0	0
2002-02-18	1	1	1	1	0	0	0	0	0	0	0	0	0	0	0	0
2002-02-19	1	1	1	1	0	0	0	0	0	0	0	0	0	0	0	0
2002-02-20	1	1	1	1	0	0	0	0	0	0	0	0	0	0	0	0
2002-02-21	1	1	1	1	0	0	0	0	0	0	0	0	0	0	0	0
2002-02-22	1	1	1	1	0	0	0	0	0	0	0	0	0	0	0	0
2002-02-23	1	1	1	1	0	0	0	0	0	0	0	0	0	0	0	0
2002-02-24	1	1	1	1	0	0	0	0	0	0	0	0	0	0	0	0
2002-02-25	1	1	1	1	0	0	0	0	0	0	0	0	0	0	0	0
2002-02-26	1	1	1	1	0	0	0	0	0	0	0	0	0	0	0	0
2002-02-27	1	1	1	1	0	0	0	0	0	0	0	0	0	0	0	0
2002-02-28	1	1	1	1	0	0	0	0	0	0	0	0	0	0	0	0
2002-03-01	1	1	1	1	0	0	0	0	0	0	0	0	0	0	0	0
2002-03-02	1	1	1	1	0	0	0	0	0	0	0	0	0	0	0	0
2002-03-03	1	1	1	1	0	0	0	0	0	0	0	0	0	0	0	0
2002-03-04	1	1	1	1	0	0	0	0	0	0	0	0	0	0	0	0
2002-03-05	1	1	1	1	0	0	0	0	0	0	0	0	0	0	0	0
2002-03-06	1	1	1	1	0	0	0	0	0	0	0	0	0	0	0	0
2002-03-07	1	1	1	1	0	0	0	0	0	0	0	0	0	0	0	0
2002-03-08	1	1	1	1	0	0	0	0	0	0	0	0	0	0	0	0
2002-03-09	1	1	1	1	0	0	0	0	0	0	0	0	0	0	0	0
2002-03-10	1	1	1	1	0	0	0	0	0	0	0	0	0	0	0	0
2002-03-11	1	1	1	1	0	0	0	0	0	0	0	0	0	0	0	0
2002-03-12	1	1	1	1	0	0	0	0	0	0	0	0	0	0	0	0
2002-03-13	1	1	1	1	0	0	0	0	0	0	0	0	0	0	0	0
2002-03-14	1	1	1	1	0	0	0	0	0	0	0	0	0	0	0	0
2002-03-15	1	1	1	1	0	0	0	0	0	0	0	0	0	0	0	0
2002-03-16	1	1	1	1	0	0	0	0	0	0	0	0	0	0	0	0
2002-03-17	1	1	1	1	0	0	0	0	0	0	0	0	0	0	0	0
2002-03-18	1	1	1	1	0	0	0	0	0	0	0	0	0	0	0	0
2002-03-19	1	1	1	1	0	0	0	0	0	0	0	0	0	0	0	0
2002-03-20	1	1	1	1	0	0	0	0	0	0	0	0	0	0	0	0
2002-03-21	1	1	1	1	0	0	0	0	0	0	0	0	0	0	0	0
2002-03-22	1	1	1	1	0	0	0	0	0	0	0	0	0	0	0	0
2002-03-23	1	1	1	1	0	0	0	0	0	0	0	0	0	0	0	0
2002-03-24	1	1	1	1	0	0	0	0	0	0	0	0	0	0	0	0
2002-03-25	1	1	1	1	0	0	0	0	0	0	0	0	0	0	0	0
2002-03-26	1	1	1	1	0	0	0	0	0	0	0	0	0	0	0	0
2002-03-27	1	1	1	1	0	0	0	0	0	0	0	0	0	0	0	0
2002-03-28	1	1	1	1	0	0	0	0	0	0	0	0	0	0	0	0
2002-03-29	1	1	1	1	0	0	0	0	0	0	0	0	0	0	0	0
2002-03-30	1	1	1	1	0	0	0	0	0	0	0	0	0	0	0	0
2002-03-31	1	1	1	1	0	0	0	0	0	0	0	0	0	0	0	0
2002-04-01	1	1	1	1	0	0	0	0	0	0	0	0	0	0	0	0
2002-04-02	1	1	1	1	0	0	0	0	0	0	0	0	0	0	0	0
2002-04-03	1	1	1	1	0	0	0	0	0	0	0	0	0	0	0	0
2002-04-04	1	1	1	1	0	0	0	0	0	0	0	0	0	0	0	0
2002-04-05	1	1	1	1	0	0	0	0	0	0	0	0	0	0	0	0
2002-04-06	1	1	1	1	0	0	0	0	0	0	0	0	0	0	0	0
2002-04-07	1	1	1	1	0	0	0	0	0	0	0	0	0	0	0	0
2002-04-08	1	1	1	1	0	0	0	0	0	0	0	0	0	0	0	0
2002-04-09	1	1	1	1	0	0	0	0	0	0	0	0	0	0	0	0
2002-04-10	1	1	1	1	0	0	0	0	0	0	0	0	0	0	0	0
2002-04-11	1	1	1	1	0	0	0	0	0	0	0	0	0	0	0	0
2002-04-12	1	1	1	1	0	0	0	0	0	0	0	0	0	0	0	0
2002-04-13	1	1	1	1	0	0	0	0	0	0	0	0	0	0	0	0
2002-04-14	1	1	1	1	0	0	0	0	0	0	0	0	0	0	0	0
2002-04-15	1	1	1	1	0	0	0	0	0	0	0	0	0	0	0	0
2002-04-16	1	1	1	1	0	0	0	0	0	0	0	0	0	0	0	0
2002-04-17	1	1	1	1	0	0	0	0	0	0	0	0	0	0	0	0
2002-04-18	1	1	1	1	0	0	0	0	0	0	0	0	0	0	0	0
2002-04-19	1	1	1	1	0	0	0	0	0	0	0	0	0	0	0	0
2002-04-20	1	1	1	1	0	0	0	0	0	0	0	0	0	0	0	0
2002-04-21	1	1	1	1	0	0	0	0	0	0	0	0	0	0	0	0
2002-04-22	1	1	1	1	0	0	0	0	0	0	0	0	0	0	0	0
2002-04-23	1	1	1	1	0	0	0	0	0	0	0	0	0	0	0	0
2002-04-24	1	1	1	1	0	0	0	0	0	0	0	0	0	0	0	0
2002-04-25	1	1	1	1	0	0	0	0	0	0	0	0	0	0	0	0
2002-04-26	1	1	1	1	0	0	0	0	0	0	0	0	0	0	0	0
2002-04-27	1	1	1	1	0	0	0	0	0	0	0	0	0	0	0	0
2002-04-28	1	1	1	1	0	0	0	0	0	0	0	0	0	0	0	0
2002-04-29	1	1	1	1	0	0	0	0	0	0	0	0	0	0	0	0
2002-04-30	1	1	1	1	0	0	0	0	0	0	0	0	0	0	0	0
2002-05-01	1	1	1	1	0	0	0	0	0	0	0	0	0	0	0	0
2002-05-02	1	1	1	1	0	0	0	0	0	0	0	0	0	0	0	0
2002-05-03	1	1	1	1	0	0	0	0	0	0	0	0	0	0	0	0
2002-05-04	1	1	1	1	0	0	0	0	0	0	0	0	0	0	0	0
2002-05-05	1	1	1	1	0	0	0	0	0	0	0	0	0	0	0	0
2002-05-06	1	1	1	1	0	0	0	0	0	0	0	0	0	0	0	0
2002-05-07	1	1	1	1	0	0	0	0	0	0	0	0	0	0	0	0
2002-05-08	1	1	1	1	0	0	0	0	0	0	0	0	0	0	0	0
2002-05-09	1	1	1	1	0	0	0	0	0	0	0	0	0	0	0	0
2002-05-10	1	1	1	1	0	0	0	0	0	0	0	0	0	0	0	0
2002-05-11	1	1	1	1	0	0	0	0	0	0	0	0	0	0	0	0
2002-05-12	1	1	1	1	0	0	0	0	0	0	0	0	0	0	0	0
2002-05-13	1	1	1	1	0	0	0	0	0	0	0	0	0	0	0	0
2002-05-14	1	1	1	1	0	0	0	0	0	0	0	0	0	0	0	0
2002-05-15	1	1	1	1	0	0	0	0	0	0	0	0	0	0	0	0
2002-05-16	1	1	1	1	0	0	0	0	0	0	0	0	0	0	0	0
2002-05-17	1	1	1	1	0	0	0	0	0	0	0	0	0	0	0	0
2002-05-18	1	1	1	1	0	0	0	0	0	0	0	0	0	0	0	0
2002-05-19	1	1	1	1	0	0	0	0	0	0	0	0	0	0	0	0
2002-05-20	1	1	1	1	0	0	0	0	0	0	0	0	0	0	0	0
2002-05-21	1	1	1	1	0	0	0	0	0	0	0	0	0	0	0	0
2002-05-22	1	1	1	1	0	0	0	0	0	0	0	0	0	0	0	0
2002-05-23	1	1	1	1	0	0	0	0	0	0	0	0	0	0	0	0
2002-05-24	1	1	1	1	0	0	0	0	0	0	0	0	0	0	0	0
2002-05-25	1	1	1	1	0	0	0	0	0	0	0	0	0	0	0	0
2002-05-26	1	1	1	1	0	0	0	0	0	0	0	0	0	0	0	0
2002-05-27	1	1	1	1	0	0	0	0	0	0	0	0	0	0	0	0
2002-05-28	1	1	1	1	0	0	0	0	0	0	0	0	0	0	0	0
2002-05-29	1	1	1	1	0	0	0	0	0	0	0	0	0	0	0	0
2002-05-30	1	1	1	1	0	0	0	0	0	0	0	0	0	0	0	0
2002-05-31	1	1	1	1	0	0	0	0	0	0	0	0	0	0	0	0
2002-06-01	1	1	1	1	0	0	0	0	0	0	0	0	0	0	0	0
2002-06-02	1	1	1	1	0	0	0	0	0	0	0	0	0	0	0	0
2002-06-03	1	1	1	1	0	0	0	0	0	0	0	0	0	0	0	0
2002-06-04	1	1	1	1	0	0	0	0	0	0	0	0	0	0	0	0
2002-06-05	1	1	1	1	0	0	0	0	0	0	0	0	0	0	0	0
2002-06-06	1	1	1	1	0	0	0	0	0	0	0	0	0	0	0	0
2002-06-07	1	1	1	1	0	0	0	0	0	0	0	0	0	0	0	0
2002-06-08	1	1	1	1	0	0	0	0	0	0	0	0	0	0	0	0
2002-06-09	1	1	1	1	0	0	0	0	0	0	0	0	0	0	0	0
2002-06-10	1	1	1	1	0	0	0	0	0	0	0	0	0	0	0	0
2002-06-11	1	1	1	1	0	0	0	0	0	0	0	0	0	0	0	0
2002-06-12	1	1	1	1	0	0	0	0	0	0	0	0	0	0	0	0
2002-06-13	1	1	1	1	0	0	0	0	0	0	0	0	0	0	0	0
2002-06-14	1	1	1	1	0	0	0	0	0	0	0	0	0	0	0	0
2002-06-15	1	1	1	1	0	0	0	0	0	0	0	0	0	0	0	0
2002-06-16	1	1	1	1	0	0	0	0	0	0	0	0	0	0	0	0
2002-06-17	1	1	1	1	0	0	0	0	0	0	0	0	0	0	0	0
2002-06-18	1	1	1	1	0	0	0	0	0	0	0	0	0	0	0	0
2002-06-19	1	1	1	1	0	0	0	0	0	0	0	0	0	0	0	0
2002-06-20	1	1	1	1	0	0	0	0	0	0	0	0	0	0	0	0
2002-06-21	1	1	1	1	0	0	0	0	0	0	0	0	0	0	0	0
2002-06-22	1	1	1	1	0	0	0	0	0	0	0	0	0	0	0	0
2002-06-23	1	1	1	1	0	0	0	0	0	0	0	0	0	0	0	0
2002-06-24	1	1	1	1	0	0	0	0	0	0	0	0	0	0	0	0
2002-06-25	1	1	1	1	0	0	0	0	0	0	0	0	0	0	0	0
2002-06-26	1	1	1	1	0	0	0	0	0	0	0	0	0	0	0	0
2002-06-27	1	1	1	1	0	0	0	0	0	0	0	0	0	0	0	0
2002-06-28	1	1	1	1	0	0	0	0	0	0	0	0	0	0	0	0
2002-06-29	1	1	1	1	0	0	0	0	0	0	0	0	0	0	0	0
2002-06-30	1	1	1	1	0	0	0	0	0	0	0	0	0	0	0	0
2002-07-01	1	1	1	1	0	0	0	0	0	0	0	0	0	0	0	0
2002-07-02	1	1	1	1	0	0	0	0	0	0	0	0	0	0	0	0
2002-07-03	1	1	1	1	0	0	0	0	0	0	0	0	0	0	0	0
2002-07-04	1	1	1	1	0	0	0	0	0	0	0	0	0	0	0	0
2002-07-05	1	1	1	1	0	0	0	0	0	0	0	0	0	0	0	0
2002-07-06	1	1	1	1	0	0	0	0	0	0	0	0	0	0	0	0
2002-07-07	1	1	1	1	0	0	0	0	0	0	0	0	0	0	0	0
2002-07-08	1	1	1	1	0	0	0	0	0	0	0	0	0	0	0	0
2002-07-09	1	1	1	1	0	0	0	0	0	0	0	0	0	0	0	0
2002-07-10	1	1	1	1	0	0	0	0	0	0	0	0	0	0	0	0
2002-07-11	1	1	1	0	0	0	0	0	0	0	0	0	0	0	0	0
2002-07-12	1	1	1	1	0	0	0	0	0	0	0	0	0	0	0	0
2002-07-13	1	1	1	1	0	0	0	0	0	0	0	0	0	0	0	0
2002-07-14	1	1	1	1	0	0	0	0	0	0	0	0	0	0	0	0
2002-07-15	1	1	1	1	0	0	0	0	0	0	0	0	0	0	0	0
2002-07-16	1	1	1	1	0	0	0	0	0	0	0	0	0	0	0	0
2002-07-17	1	1	1	1	0	0	0	0	0	0	0	0	0	0	0	0
2002-07-18	1	1	1	1	0	0	0	0	0	0	0	0	0	0	0	0
2002-07-19	1	1	1	1	0	0	0	0	0	0	0	0	0	0	0	0
2002-07-20	1	1	1	1	0	0	0	0	0	0	0	0	0	0	0	0
2002-07-21	1	1	1	1	0	0	0	0	0	0	0	0	0	0	0	0
2002-07-22	1	1	1	1	0	0	0	0	0	0	0	0	0	0	0	0
2002-07-23	1	1	1	1	0	0	0	0	0	0	0	0	0	0	0	0
2002-07-24	1	1	1	1	0	0	0	0	0	0	0	0	0	0	0	0
2002-07-25	1	1	1	1	0	0	0	0	0	0	0	0	0	0	0	0
2002-07-26	1	1	1	1	0	0	0	0	0	0	0	0	0	0	0	0
2002-07-27	1	1	1	1	0	0	0	0	0	0	0	0	0	0	0	0
2002-07-28	1	1	1	1	0	0	0	0	0	0	0	0	0	0	0	0
2002-07-29	1	1	1	1	0	0	0	0	0	0	0	0	0	0	0	0
2002-07-30	1	1	1	1	0	0	0	0	0	0	0	0	0	0	0	0
2002-07-31	1	1	1	1	0	0	0	0	0	0	0	0	0	0	0	0
2002-08-01	1	1	1	1	0	0	0	0	0	0	0	0	0	0	0	0
2002-08-02	1	1	1	1	0	0	0	0	0	0	0	0	0	0	0	0
2002-08-03	1	1	1	1	0	0	0	0	0	0	0	0	0	0	0	0
2002-08-04	1	1	1	1	0	0	0	0	0	0	0	0	0	0	0	0
2002-08-05	1	1	1	1	0	0	0	0	0	0	0	0	0	0	0	0
2002-08-06	1	1	1	1	0	0	0	0	0	0	0	0	0	0	0	0
2002-08-07	1	1	1	1	0	0	0	0	0	0	0	0	0	0	0	0
2002-08-08	1	1	1	1	0	0	0	0	0	0	0	0	0	0	0	0
2002-08-09	1	1	1	1	0	0	0	0	0	0	0	0	0	0	0	0
2002-08-10	1	1	1	1	0	0	0	0	0	0	0	0	0	0	0	0
2002-08-11	1	1	1	1	0	0	0	0	0	0	0	0	0	0	0	0
2002-08-12	1	1	1	1	0	0	0	0	0	0	0	0	0	0	0	0
2002-08-13	1	1	1	1	0	0	0	0	0	0	0	0	0	0	0	0
2002-08-14	1	1	1	1	0	0	0	0	0	0	0	0	0	0	0	0
2002-08-15	1	1	1	1	0	0	0	0	0	0	0	0	0	0	0	0
2002-08-16	1	1	1	1	0	0	0	0	0	0	0	0	0	0	0	0
2002-08-17	1	1	1	1	0	0	0	0	0	0	0	0	0	0	0	0
2002-08-18	1	1	1	1	0	0	0	0	0	0	0	0	0	0	0	0
2002-08-19	1	1	1	1	0	0	0	0	0	0	0	0	0	0	0	0
2002-08-20	1	1	1	1	0	0	0	0	0	0	0	0	0	0	0	0
2002-08-21	1	1	1	1	0	0	0	0	0	0	0	0	0	0	0	0
2002-08-22	1	1	1	1	0	0	0	0	0	0	0	0	0	0	0	0
2002-08-23	1	1	1	1	0	0	0	0	0	0	0	0	0	0	0	0
2002-08-24	1	1	1	1	0	0	0	0	0	0	0	0	0	0	0	0
2002-08-25	1	1	1	1	0	0	0	0	0	0	0	0	0	0	0	0
2002-08-26	1	1	1	1	0	0	0	0	0	0	0	0	0	0	0	0
2002-08-27	1	1	1	1	0	0	0	0	0	0	0	0	0	0	0	0
2002-08-28	1	1	1	1	0	0	0	0	0	0	0	0	0	0	0	0
2002-08-29	1	1	1	1	0	0	0	0	0	0	0	0	0	0	0	0
2002-08-30	1	1	1	1	0	0	0	0	0	0	0	0	0	0	0	0
2002-08-31	1	1	1	1	0	0	0	0	0	0	0	0	0	0	0	0
2002-09-01	1	1	1	1	0	0	0	0	0	0	0	0	0	0	0	0
2002-09-02	1	1	1	1	0	0	0	0	0	0	0	0	0	0	0	0
2002-09-03	1	1	1	1	0	0	0	0	0	0	0	0	0	0	0	0
2002-09-04	1	1	1	1	0	0	0	0	0	0	0	0	0	0	0	0
2002-09-05	1	1	1	1	0	0	0	0	0	0	0	0	0	0	0	0
2002-09-06	1	1	1	1	0	0	0	0	0	0	0	0	0	0	0	0
2002-09-07	1	1	1	1	0	0	0	0	0	0	0	0	0	0	0	0
2002-09-08	1	1	1	1	0	0	0	0	0	0	0	0	0	0	0	0
2002-09-09	1	1	1	1	0	0	0	0	0	0	0	0	0	0	0	0
2002-09-10	1	1	1	1	0	0	0	0	0	0	0	0	0	0	0	0
2002-09-11	1	1	1	1	0	0	0	0	0	0	0	0	0	0	0	0
2002-09-12	1	1	1	1	0	0	0	0	0	0	0	0	0	0	0	0
2002-09-13	1	1	1	1	0	0	0	0	0	0	0	0	0	0	0	0
2002-09-14	1	1	1	1	0	0	0	0	0	0	0	0	0	0	0	0
2002-09-15	1	1	1	1	0	0	0	0	0	0	0	0	0	0	0	0
2002-09-16	1	1	1	1	0	0	0	0	0	0	0	0	0	0	0	0
2002-09-17	1	1	1	1	0	0	0	0	0	0	0	0	0	0	0	0
2002-09-18	1	1	1	1	0	0	0	0	0	0	0	0	0	0	0	0
2002-09-19	1	1	1	1	0	0	0	0	0	0	0	0	0	0	0	0
2002-09-20	1	1	1	1	0	0	0	0	0	0	0	0	0	0	0	0
2002-09-21	1	1	1	1	0	0	0	0	0	0	0	0	0	0	0	0
2002-09-22	1	1	1	1	0	0	0	0	0	0	0	0	0	0	0	0
2002-09-23	1	1	1	1	0	0	0	0	0	0	0	0	0	0	0	0
2002-09-24	1	1	1	1	0	0	0	0	0	0	0	0	0	0	0	0
2002-09-25	1	1	1	1	0	0	0	0	0	0	0	0	0	0	0	0
2002-09-26	1	1	1	1	0	0	0	0	0	0	0	0	0	0	0	0
2002-09-27	1	1	1	1	0	0	0	0	0	0	0	0	0	0	0	0
2002-09-28	1	1	1	1	0	0	0	0	0	0	0	0	0	0	0	0
2002-09-29	1	1	1	1	0	0	0	0	0	0	0	0	0	0	0	0
2002-09-30	1	1	1	1	0	0	0	0	0	0	0	0	0	0	0	0
2002-10-01	1	1	1	1	0	0	0	0	0	0	0	0	0	0	0	0
2002-10-02	1	1	1	1	0	0	0	0	0	0	0	0	0	0	0	0
2002-10-03	1	1	1	1	0	0	0	0	0	0	0	0	0	0	0	0
2002-10-04	1	1	1	1	0	0	0	0	0	0	0	0	0	0	0	0
2002-10-05	1	1	1	1	0	0	0	0	0	0	0	0	0	0	0	0
2002-10-06	1	1	1	1	0	0	0	0	0	0	0	0	0	0	0	0
2002-10-07	1	1	1	1	0	0	0	0	0	0	0	0	0	0	0	0
2002-10-08	1	1	1	1	0	0	0	0	0	0	0	0	0	0	0	0
2002-10-09	1	1	1	1	0	0	0	0	0	0	0	0	0	0	0	0
2002-10-10	1	1	1	1	0	0	0	0	0	0	0	0	0	0	0	0
2002-10-11	1	1	1	1	0	0	0	0	0	0	0	0	0	0	0	0
2002-10-12	1	1	1	1	0	0	0	0	0	0	0	0	0	0	0	0
2002-10-13	1	1	1	1	0	0	0	0	0	0	0	0	0	0	0	0
2002-10-14	1	1	1	1	0	0	0	0	0	0	0	0	0	0	0	0
2002-10-15	1	1	1	1	0	0	0	0	0	0	0	0	0	0	0	0
2002-10-16	1	1	1	1	0	0	0	0	0	0	0	0	0	0	0	0
2002-10-17	1	1	1	1	0	0	0	0	0	0	0	0	0	0	0	0
2002-10-18	1	1	1	1	0	0	0	0	0	0	0	0	0	0	0	0
2002-10-19	1	1	1	1	0	0	0	0	0	0	0	0	0	0	0	0
2002-10-20	1	1	1	1	0	0	0	0	0	0	0	0	0	0	0	0
2002-10-21	1	0	1	1	0	0	0	0	0	0	0	0	0	0	0	0
2002-10-22	1	1	1	1	0	0	0	0	0	0	0	0	0	0	0	0
2002-10-23	1	1	1	1	0	0	0	0	0	0	0	0	0	0	0	0
2002-10-24	1	1	1	1	0	0	0	0	0	0	0	0	0	0	0	0
2002-10-25	1	1	1	1	0	0	0	0	0	0	0	0	0	0	0	0
2002-10-26	1	1	1	1	0	0	0	0	0	0	0	0	0	0	0	0
2002-10-27	1	1	1	1	0	0	0	0	0	0	0	0	0	0	0	0
2002-10-28	1	1	1	1	0	0	0	0	0	0	0	0	0	0	0	0
2002-10-29	1	1	1	1	0	0	0	0	0	0	0	0	0	0	0	0
2002-10-30	1	1	1	1	0	0	0	0	0	0	0	0	0	0	0	0
2002-10-31	1	1	1	1	0	0	0	0	0	0	0	0	0	0	0	0
2002-11-01	1	1	1	1	0	0	0	0	0	0	0	0	0	0	0	0
2002-11-02	1	1	1	1	0	0	0	0	0	0	0	0	0	0	0	0
2002-11-03	1	1	1	1	0	0	0	0	0	0	0	0	0	0	0	0
2002-11-04	1	1	1	1	0	0	0	0	0	0	0	0	0	0	0	0
2002-11-05	1	1	1	1	0	0	0	0	0	0	0	0	0	0	0	0
2002-11-06	1	1	1	1	0	0	0	0	0	0	0	0	0	0	0	0
2002-11-07	1	1	1	1	0	0	0	0	0	0	0	0	0	0	0	0
2002-11-08	1	1	1	1	0	0	0	0	0	0	0	0	0	0	0	0
2002-11-09	1	1	1	1	0	0	0	0	0	0	0	0	0	0	0	0
2002-11-10	1	1	1	1	0	0	0	0	0	0	0	0	0	0	0	0
2002-11-11	1	1	1	1	0	0	0	0	0	0	0	0	0	0	0	0
2002-11-12	1	1	1	1	0	0	0	0	0	0	0	0	0	0	0	0
2002-11-13	0	1	1	1	0	0	0	0	0	0	0	0	0	0	0	0
2002-11-14	1	1	1	1	0	0	0	0	0	0	0	0	0	0	0	0
2002-11-15	1	1	1	1	0	0	0	0	0	0	0	0	0	0	0	0
2002-11-16	1	1	1	1	0	0	0	0	0	0	0	0	0	0	0	0
2002-11-17	1	1	1	1	0	0	0	0	0	0	0	0	0	0	0	0
2002-11-18	1	1	1	1	0	0	0	0	0	0	0	0	0	0	0	0
2002-11-19	1	1	1	1	0	0	0	0	0	0	0	0	0	0	0	0
2002-11-20	1	1	1	1	0	0	0	0	0	0	0	0	0	0	0	0
2002-11-21	1	1	1	1	0	0	0	0	0	0	0	0	0	0	0	0
2002-11-22	1	1	1	1	0	0	0	0	0	0	0	0	0	0	0	0
2002-11-23	1	1	1	1	0	0	0	0	0	0	0	0	0	0	0	0
2002-11-24	1	1	1	1	0	0	0	0	0	0	0	0	0	0	0	0
2002-11-25	1	1	1	1	0	0	0	0	0	0	0	0	0	0	0	0
2002-11-26	1	1	1	1	0	0	0	0	0	0	0	0	0	0	0	0
2002-11-27	1	1	1	1	0	0	0	0	0	0	0	0	0	0	0	0
2002-11-28	1	1	1	1	0	0	0	0	0	0	0	0	0	0	0	0
2002-11-29	1	1	1	1	0	0	0	0	0	0	0	0	0	0	0	0
2002-11-30	1	1	1	1	0	0	0	0	0	0	0	0	0	0	0	0
2002-12-01	1	1	1	1	0	0	0	0	0	0	0	0	0	0	0	0
2002-12-02	1	1	1	1	0	0	0	0	0	0	0	0	0	0	0	0
2002-12-03	1	1	0	0	0	0	0	0	0	0	0	0	0	0	0	0
2002-12-04	1	1	1	1	0	0	0	0	0	0	0	0	0	0	0	0
2002-12-05	1	1	1	1	0	0	0	0	0	0	0	0	0	0	0	0
2002-12-06	1	1	1	1	0	0	0	0	0	0	0	0	0	0	0	0
2002-12-07	1	1	1	1	0	0	0	0	0	0	0	0	0	0	0	0
2002-12-08	1	1	1	1	0	0	0	0	0	0	0	0	0	0	0	0
2002-12-09	1	1	1	1	0	0	0	0	0	0	0	0	0	0	0	0
2002-12-10	1	1	1	1	0	0	0	0	0	0	0	0	0	0	0	0
2002-12-11	1	1	1	1	0	0	0	0	0	0	0	0	0	0	0	0
2002-12-12	1	1	1	1	0	0	0	0	0	0	0	0	0	0	0	0
2002-12-13	1	1	1	1	0	0	0	0	0	0	0	0	0	0	0	0
2002-12-14	1	1	1	1	0	0	0	0	0	0	0	0	0	0	0	0
2002-12-15	1	1	1	1	0	0	0	0	0	0	0	0	0	0	0	0
2002-12-16	1	1	1	1	0	0	0	0	0	0	0	0	0	0	0	0
2002-12-17	1	1	1	1	0	0	0	0	0	0	0	0	0	0	0	0
2002-12-18	1	1	1	1	0	0	0	0	0	0	0	0	0	0	0	0
2002-12-19	1	1	1	1	0	0	0	0	0	0	0	0	0	0	0	0
2002-12-20	1	1	1	1	0	0	0	0	0	0	0	0	0	0	0	0
2002-12-21	1	1	1	1	0	0	0	0	0	0	0	0	0	0	0	0
2002-12-22	1	1	1	1	0	0	0	0	0	0	0	0	0	0	0	0
2002-12-23	1	1	1	1	0	0	0	0	0	0	0	0	0	0	0	0
2002-12-24	1	1	1	1	0	0	0	0	0	0	0	0	0	0	0	0
2002-12-25	1	1	1	1	0	0	0	0	0	0	0	0	0	0	0	0
2002-12-26	1	1	1	1	0	0	0	0	0	0	0	0	0	0	0	0
2002-12-27	1	1	1	1	0	0	0	0	0	0	0	0	0	0	0	0
2002-12-28	1	1	1	1	0	0	0	0	0	0	0	0	0	0	0	0
2002-12-29	1	1	1	1	0	0	0	0	0	0	0	0	0	0	0	0
2002-12-30	1	1	1	1	0	0	0	0	0	0	0	0	0	0	0	0
2002-12-31	1	1	1	1	0	0	0	0	0	0	0	0	0	0	0	0
2003-01-01	1	1	1	1	0	0	0	0	0	0	0	0	0	0	0	0
2003-01-02	1	1	1	1	0	0	0	0	0	0	0	0	0	0	0	0
2003-01-03	1	1	1	1	0	0	0	0	0	0	0	0	0	0	0	0
2003-01-04	1	1	1	1	0	0	0	0	0	0	0	0	0	0	0	0
2003-01-05	1	1	1	1	0	0	0	0	0	0	0	0	0	0	0	0
2003-01-06	1	1	1	1	0	0	0	0	0	0	0	0	0	0	0	0
2003-01-07	1	1	1	1	0	0	0	0	0	0	0	0	0	0	0	0
2003-01-08	1	1	1	1	0	0	0	0	0	0	0	0	0	0	0	0
2003-01-09	1	1	1	1	0	0	0	0	0	0	0	0	0	0	0	0
2003-01-10	1	1	1	1	0	0	0	0	0	0	0	0	0	0	0	0
2003-01-11	1	1	1	1	0	0	0	0	0	0	0	0	0	0	0	0
2003-01-12	1	1	1	1	0	0	0	0	0	0	0	0	0	0	0	0
2003-01-13	1	1	1	1	0	0	0	0	0	0	0	0	0	0	0	0
2003-01-14	1	1	1	1	0	0	0	0	0	0	0	0	0	0	0	0
2003-01-15	1	1	1	1	0	0	0	0	0	0	0	0	0	0	0	0
2003-01-16	1	1	1	1	0	0	0	0	0	0	0	0	0	0	0	0
2003-01-17	1	1	1	1	0	0	0	0	0	0	0	0	0	0	0	0
2003-01-18	1	1	1	1	0	0	0	0	0	0	0	0	0	0	0	0
2003-01-19	1	1	1	1	0	0	0	0	0	0	0	0	0	0	0	0
2003-01-20	1	1	1	1	0	0	0	0	0	0	0	0	0	0	0	0
2003-01-21	1	1	1	1	0	0	0	0	0	0	0	0	0	0	0	0
2003-01-22	1	1	1	1	0	0	0	0	0	0	0	0	0	0	0	0
2003-01-23	1	1	1	1	0	0	0	0	0	0	0	0	0	0	0	0
2003-01-24	1	1	1	1	0	0	0	0	0	0	0	0	0	0	0	0
2003-01-25	1	1	1	1	0	0	0	0	0	0	0	0	0	0	0	0
2003-01-26	1	1	1	1	0	0	0	0	0	0	0	0	0	0	0	0
2003-01-27	1	1	1	1	0	0	0	0	0	0	0	0	0	0	0	0
2003-01-28	1	1	1	1	0	0	0	0	0	0	0	0	0	0	0	0
2003-01-29	1	1	1	1	0	0	0	0	0	0	0	0	0	0	0	0
2003-01-30	1	1	1	1	0	0	0	0	0	0	0	0	0	0	0	0
2003-01-31	1	1	1	1	0	0	0	0	0	0	0	0	0	0	0	0
2003-02-01	1	1	1	1	0	0	0	0	0	0	0	0	0	0	0	0
2003-02-02	1	1	1	1	0	0	0	0	0	0	0	0	0	0	0	0
2003-02-03	1	1	1	1	0	0	0	0	0	0	0	0	0	0	0	0
2003-02-04	1	1	1	1	0	0	0	0	0	0	0	0	0	0	0	0
2003-02-05	1	1	1	1	0	0	0	0	0	0	0	0	0	0	0	0
2003-02-06	1	1	1	1	0	0	0	0	0	0	0	0	0	0	0	0
2003-02-07	1	1	1	1	0	0	0	0	0	0	0	0	0	0	0	0
2003-02-08	1	1	1	1	0	0	0	0	0	0	0	0	0	0	0	0
2003-02-09	1	1	1	1	0	0	0	0	0	0	0	0	0	0	0	0
2003-02-10	1	1	1	1	0	0	0	0	0	0	0	0	0	0	0	0
2003-02-11	1	1	1	1	0	0	0	0	0	0	0	0	0	0	0	0
2003-02-12	1	1	1	1	0	0	0	0	0	0	0	0	0	0	0	0
2003-02-13	1	1	1	1	0	0	0	0	0	0	0	0	0	0	0	0
2003-02-14	1	1	1	1	0	0	0	0	0	0	0	0	0	0	0	0
2003-02-15	1	1	1	1	0	0	0	0	0	0	0	0	0	0	0	0
2003-02-16	1	1	1	1	0	0	0	0	0	0	0	0	0	0	0	0
2003-02-17	1	1	1	1	0	0	0	0	0	0	0	0	0	0	0	0
2003-02-18	1	1	1	1	0	0	0	0	0	0	0	0	0	0	0	0
2003-02-19	1	1	1	1	0	0	0	0	0	0	0	0	0	0	0	0
2003-02-20	1	1	1	1	0	0	0	0	0	0	0	0	0	0	0	0
2003-02-21	1	1	1	1	0	0	0	0	0	0	0	0	0	0	0	0
2003-02-22	1	1	1	1	0	0	0	0	0	0	0	0	0	0	0	0
2003-02-23	1	1	1	1	0	0	0	0	0	0	0	0	0	0	0	0
2003-02-24	1	1	1	1	0	0	0	0	0	0	0	0	0	0	0	0
2003-02-25	1	1	1	1	0	0	0	0	0	0	0	0	0	0	0	0
2003-02-26	1	1	1	1	0	0	0	0	0	0	0	0	0	0	0	0
2003-02-27	1	1	1	1	0	0	0	0	0	0	0	0	0	0	0	0
2003-02-28	1	1	1	1	0	0	0	0	0	0	0	0	0	0	0	0
2003-03-01	1	1	1	1	0	0	0	0	0	0	0	0	0	0	0	0
2003-03-02	1	1	1	1	0	0	0	0	0	0	0	0	0	0	0	0
2003-03-03	1	1	1	1	0	0	0	0	0	0	0	0	0	0	0	0
2003-03-04	1	1	1	1	0	0	0	0	0	0	0	0	0	0	0	0
2003-03-05	1	1	1	1	0	0	0	0	0	0	0	0	0	0	0	0
2003-03-06	1	1	1	1	0	0	0	0	0	0	0	0	0	0	0	0
2003-03-07	1	1	1	1	0	0	0	0	0	0	0	0	0	0	0	0
2003-03-08	1	1	1	1	0	0	0	0	0	0	0	0	0	0	0	0
2003-03-09	1	1	1	1	0	0	0	0	0	0	0	0	0	0	0	0
2003-03-10	1	1	1	1	0	0	0	0	0	0	0	0	0	0	0	0
2003-03-11	1	1	1	1	0	0	0	0	0	0	0	0	0	0	0	0
2003-03-12	1	1	1	1	0	0	0	0	0	0	0	0	0	0	0	0
2003-03-13	1	1	1	1	0	0	0	0	0	0	0	0	0	0	0	0
2003-03-14	1	1	1	1	0	0	0	0	0	0	0	0	0	0	0	0
2003-03-15	1	1	1	1	0	0	0	0	0	0	0	0	0	0	0	0
2003-03-16	1	1	1	1	0	0	0	0	0	0	0	0	0	0	0	0
2003-03-17	1	1	1	1	0	0	0	0	0	0	0	0	0	0	0	0
2003-03-18	1	1	1	1	0	0	0	0	0	0	0	0	0	0	0	0
2003-03-19	1	1	1	1	0	0	0	0	0	0	0	0	0	0	0	0
2003-03-20	1	1	1	1	0	0	0	0	0	0	0	0	0	0	0	0
2003-03-21	1	1	1	1	0	0	0	0	0	0	0	0	0	0	0	0
2003-03-22	1	1	1	1	0	0	0	0	0	0	0	0	0	0	0	0
2003-03-23	1	1	1	1	0	0	0	0	0	0	0	0	0	0	0	0
2003-03-24	1	1	1	1	0	0	0	0	0	0	0	0	0	0	0	0
2003-03-25	1	1	1	1	0	0	0	0	0	0	0	0	0	0	0	0
2003-03-26	1	1	1	1	0	0	0	0	0	0	0	0	0	0	0	0
2003-03-27	1	1	1	1	0	0	0	0	0	0	0	0	0	0	0	0
2003-03-28	1	1	1	1	0	0	0	0	0	0	0	0	0	0	0	0
2003-03-29	1	1	1	1	0	0	0	0	0	0	0	0	0	0	0	0
2003-03-30	1	1	1	1	0	0	0	0	0	0	0	0	0	0	0	0
2003-03-31	1	1	1	1	0	0	0	0	0	0	0	0	0	0	0	0
2003-04-01	1	1	1	1	0	0	0	0	0	0	0	0	0	0	0	0
2003-04-02	1	1	1	1	0	0	0	0	0	0	0	0	0	0	0	0
2003-04-03	1	1	1	1	0	0	0	0	0	0	0	0	0	0	0	0
2003-04-04	1	1	1	1	0	0	0	0	0	0	0	0	0	0	0	0
2003-04-05	1	1	1	1	0	0	0	0	0	0	0	0	0	0	0	0
2003-04-06	1	1	1	1	0	0	0	0	0	0	0	0	0	0	0	0
2003-04-07	1	1	1	1	0	0	0	0	0	0	0	0	0	0	0	0
2003-04-08	1	1	1	1	0	0	0	0	0	0	0	0	0	0	0	0
2003-04-09	1	1	1	1	0	0	0	0	0	0	0	0	0	0	0	0
2003-04-10	1	1	1	1	0	0	0	0	0	0	0	0	0	0	0	0
2003-04-11	1	1	1	1	0	0	0	0	0	0	0	0	0	0	0	0
2003-04-12	1	1	1	1	0	0	0	0	0	0	0	0	0	0	0	0
2003-04-13	1	1	1	1	0	0	0	0	0	0	0	0	0	0	0	0
2003-04-14	1	1	1	1	0	0	0	0	0	0	0	0	0	0	0	0
2003-04-15	1	1	1	1	0	0	0	0	0	0	0	0	0	0	0	0
2003-04-16	1	1	1	1	0	0	0	0	0	0	0	0	0	0	0	0
2003-04-17	1	1	1	1	0	0	0	0	0	0	0	0	0	0	0	0
2003-04-18	1	1	1	1	0	0	0	0	0	0	0	0	0	0	0	0
2003-04-19	1	1	1	1	0	0	0	0	0	0	0	0	0	0	0	0
2003-04-20	1	1	1	1	0	0	0	0	0	0	0	0	0	0	0	0
2003-04-21	1	1	1	1	0	0	0	0	0	0	0	0	0	0	0	0
2003-04-22	1	1	1	1	0	0	0	0	0	0	0	0	0	0	0	0
2003-04-23	1	1	1	1	0	0	0	0	0	0	0	0	0	0	0	0
2003-04-24	1	1	1	1	0	0	0	0	0	0	0	0	0	0	0	0
2003-04-25	1	1	1	1	0	0	0	0	0	0	0	0	0	0	0	0
2003-04-26	1	1	1	1	0	0	0	0	0	0	0	0	0	0	0	0
2003-04-27	1	1	1	1	0	0	0	0	0	0	0	0	0	0	0	0
2003-04-28	1	1	1	1	0	0	0	0	0	0	0	0	0	0	0	0
2003-04-29	1	1	1	1	0	0	0	0	0	0	0	0	0	0	0	0
2003-04-30	1	1	1	1	0	0	0	0	0	0	0	0	0	0	0	0
2003-05-01	1	1	1	1	0	0	0	0	0	0	0	0	0	0	0	0
2003-05-02	1	1	1	1	0	0	0	0	0	0	0	0	0	0	0	0
2003-05-03	1	1	1	1	0	0	0	0	0	0	0	0	0	0	0	0
2003-05-04	1	1	1	1	0	0	0	0	0	0	0	0	0	0	0	0
2003-05-05	1	1	1	1	0	0	0	0	0	0	0	0	0	0	0	0
2003-05-06	1	1	1	1	0	0	0	0	0	0	0	0	0	0	0	0
2003-05-07	1	1	1	1	0	0	0	0	0	0	0	0	0	0	0	0
2003-05-08	1	1	1	1	0	0	0	0	0	0	0	0	0	0	0	0
2003-05-09	1	1	1	1	0	0	0	0	0	0	0	0	0	0	0	0
2003-05-10	1	1	1	1	0	0	0	0	0	0	0	0	0	0	0	0
2003-05-11	1	1	1	1	0	0	0	0	0	0	0	0	0	0	0	0
2003-05-12	1	1	1	1	0	0	0	0	0	0	0	0	0	0	0	0
2003-05-13	1	1	1	1	0	0	0	0	0	0	0	0	0	0	0	0
2003-05-14	1	1	1	1	0	0	0	0	0	0	0	0	0	0	0	0
2003-05-15	1	1	1	1	0	0	0	0	0	0	0	0	0	0	0	0
2003-05-16	1	1	1	1	0	0	0	0	0	0	0	0	0	0	0	0
2003-05-17	1	1	1	1	0	0	0	0	0	0	0	0	0	0	0	0
2003-05-18	1	1	1	1	0	0	0	0	0	0	0	0	0	0	0	0
2003-05-19	1	1	1	1	0	0	0	0	0	0	0	0	0	0	0	0
2003-05-20	1	1	1	1	0	0	0	0	0	0	0	0	0	0	0	0
2003-05-21	1	1	1	1	0	0	0	0	0	0	0	0	0	0	0	0
2003-05-22	1	1	1	1	0	0	0	0	0	0	0	0	0	0	0	0
2003-05-23	1	1	1	1	0	0	0	0	0	0	0	0	0	0	0	0
2003-05-24	1	1	1	1	0	0	0	0	0	0	0	0	0	0	0	0
2003-05-25	1	1	1	1	0	0	0	0	0	0	0	0	0	0	0	0
2003-05-26	1	1	1	1	0	0	0	0	0	0	0	0	0	0	0	0
2003-05-27	1	1	1	1	0	0	0	0	0	0	0	0	0	0	0	0
2003-05-28	1	1	1	1	0	0	0	0	0	0	0	0	0	0	0	0
2003-05-29	1	1	1	1	0	0	0	0	0	0	0	0	0	0	0	0
2003-05-30	1	1	1	1	0	0	0	0	0	0	0	0	0	0	0	0
2003-05-31	1	1	1	1	0	0	0	0	0	0	0	0	0	0	0	0
2003-06-01	1	1	1	1	0	0	0	0	0	0	0	0	0	0	0	0
2003-06-02	1	1	1	1	0	0	0	0	0	0	0	0	0	0	0	0
2003-06-03	1	1	1	1	0	0	0	0	0	0	0	0	0	0	0	0
2003-06-04	1	1	1	1	0	0	0	0	0	0	0	0	0	0	0	0
2003-06-05	1	1	1	1	0	0	0	0	0	0	0	0	0	0	0	0
2003-06-06	1	1	1	1	0	0	0	0	0	0	0	0	0	0	0	0
2003-06-07	1	1	1	1	0	0	0	0	0	0	0	0	0	0	0	0
2003-06-08	1	1	1	1	0	0	0	0	0	0	0	0	0	0	0	0
2003-06-09	1	1	1	1	0	0	0	0	0	0	0	0	0	0	0	0
2003-06-10	1	1	1	1	0	0	0	0	0	0	0	0	0	0	0	0
2003-06-11	1	1	1	1	0	0	0	0	0	0	0	0	0	0	0	0
2003-06-12	1	1	1	1	0	0	0	0	0	0	0	0	0	0	0	0
2003-06-13	1	1	1	1	0	0	0	0	0	0	0	0	0	0	0	0
2003-06-14	1	1	1	1	0	0	0	0	0	0	0	0	0	0	0	0
2003-06-15	1	1	1	1	0	0	0	0	0	0	0	0	0	0	0	0
2003-06-16	1	1	1	1	0	0	0	0	0	0	0	0	0	0	0	0
2003-06-17	1	1	1	1	0	0	0	0	0	0	0	0	0	0	0	0
2003-06-18	1	1	1	1	0	0	0	0	0	0	0	0	0	0	0	0
2003-06-19	1	1	1	1	0	0	0	0	0	0	0	0	0	0	0	0
2003-06-20	1	1	1	1	0	0	0	0	0	0	0	0	0	0	0	0
2003-06-21	1	1	1	1	0	0	0	0	0	0	0	0	0	0	0	0
2003-06-22	1	1	1	1	0	0	0	0	0	0	0	0	0	0	0	0
2003-06-23	1	1	1	1	0	0	0	0	0	0	0	0	0	0	0	0
2003-06-24	1	1	1	1	0	0	0	0	0	0	0	0	0	0	0	0
2003-06-25	1	1	1	1	0	0	0	0	0	0	0	0	0	0	0	0
2003-06-26	1	1	1	1	0	0	0	0	0	0	0	0	0	0	0	0
2003-06-27	1	1	1	1	0	0	0	0	0	0	0	0	0	0	0	0
2003-06-28	1	1	1	1	0	0	0	0	0	0	0	0	0	0	0	0
2003-06-29	1	1	1	1	0	0	0	0	0	0	0	0	0	0	0	0
2003-06-30	1	1	1	1	0	0	0	0	0	0	0	0	0	0	0	0
2003-07-01	1	1	1	1	0	0	0	0	0	0	0	0	0	0	0	0
2003-07-02	1	1	1	1	0	0	0	0	0	0	0	0	0	0	0	0
2003-07-03	1	1	1	1	0	0	0	0	0	0	0	0	0	0	0	0
2003-07-04	1	1	1	1	0	0	0	0	0	0	0	0	0	0	0	0
2003-07-05	1	1	1	1	0	0	0	0	0	0	0	0	0	0	0	0
2003-07-06	1	1	1	1	0	0	0	0	0	0	0	0	0	0	0	0
2003-07-07	1	1	1	1	0	0	0	0	0	0	0	0	0	0	0	0
2003-07-08	1	1	1	1	0	0	0	0	0	0	0	0	0	0	0	0
2003-07-09	1	1	1	1	0	0	0	0	0	0	0	0	0	0	0	0
2003-07-10	1	1	1	1	0	0	0	0	0	0	0	0	0	0	0	0
2003-07-11	1	1	1	1	0	0	0	0	0	0	0	0	0	0	0	0
2003-07-12	1	1	1	1	0	0	0	0	0	0	0	0	0	0	0	0
2003-07-13	1	1	1	1	0	0	0	0	0	0	0	0	0	0	0	0
2003-07-14	1	1	1	1	0	0	0	0	0	0	0	0	0	0	0	0
2003-07-15	1	1	1	1	0	0	0	0	0	0	0	0	0	0	0	0
2003-07-16	1	1	1	1	0	0	0	0	0	0	0	0	0	0	0	0
2003-07-17	1	1	1	1	0	0	0	0	0	0	0	0	0	0	0	0
2003-07-18	1	1	1	1	0	0	0	0	0	0	0	0	0	0	0	0
2003-07-19	1	1	1	1	0	0	0	0	0	0	0	0	0	0	0	0
2003-07-20	1	1	1	1	0	0	0	0	0	0	0	0	0	0	0	0
2003-07-21	1	1	1	1	0	0	0	0	0	0	0	0	0	0	0	0
2003-07-22	1	1	1	1	0	0	0	0	0	0	0	0	0	0	0	0
2003-07-23	1	1	1	1	0	0	0	0	0	0	0	0	0	0	0	0
2003-07-24	1	1	1	1	0	0	0	0	0	0	0	0	0	0	0	0
2003-07-25	1	1	1	1	0	0	0	0	0	0	0	0	0	0	0	0
2003-07-26	1	1	1	1	0	0	0	0	0	0	0	0	0	0	0	0
2003-07-27	1	1	1	1	0	0	0	0	0	0	0	0	0	0	0	0
2003-07-28	1	1	1	1	0	0	0	0	0	0	0	0	0	0	0	0
2003-07-29	1	1	1	1	0	0	0	0	0	0	0	0	0	0	0	0
2003-07-30	1	1	1	1	0	0	0	0	0	0	0	0	0	0	0	0
2003-07-31	1	1	1	1	0	0	0	0	0	0	0	0	0	0	0	0
2003-08-01	1	1	1	1	0	0	0	0	0	0	0	0	0	0	0	0
2003-08-02	1	1	1	1	0	0	0	0	0	0	0	0	0	0	0	0
2003-08-03	1	1	1	1	0	0	0	0	0	0	0	0	0	0	0	0
2003-08-04	1	1	1	1	0	0	0	0	0	0	0	0	0	0	0	0
2003-08-05	1	1	1	1	0	0	0	0	0	0	0	0	0	0	0	0
2003-08-06	1	1	1	1	0	0	0	0	0	0	0	0	0	0	0	0
2003-08-07	1	1	1	1	0	0	0	0	0	0	0	0	0	0	0	0
2003-08-08	1	1	1	1	0	0	0	0	0	0	0	0	0	0	0	0
2003-08-09	1	1	1	1	0	0	0	0	0	0	0	0	0	0	0	0
2003-08-10	1	1	1	1	0	0	0	0	0	0	0	0	0	0	0	0
2003-08-11	1	1	1	1	0	0	0	0	0	0	0	0	0	0	0	0
2003-08-12	1	1	1	1	0	0	0	0	0	0	0	0	0	0	0	0
2003-08-13	1	1	1	1	0	0	0	0	0	0	0	0	0	0	0	0
2003-08-14	1	1	1	1	0	0	0	0	0	0	0	0	0	0	0	0
2003-08-15	1	1	1	1	0	0	0	0	0	0	0	0	0	0	0	0
2003-08-16	1	1	1	1	0	0	0	0	0	0	0	0	0	0	0	0
2003-08-17	1	1	1	1	0	0	0	0	0	0	0	0	0	0	0	0
2003-08-18	1	1	1	1	0	0	0	0	0	0	0	0	0	0	0	0
2003-08-19	1	1	1	1	0	0	0	0	0	0	0	0	0	0	0	0
2003-08-20	1	1	1	1	0	0	0	0	0	0	0	0	0	0	0	0
2003-08-21	1	1	1	1	0	0	0	0	0	0	0	0	0	0	0	0
2003-08-22	1	1	1	1	0	0	0	0	0	0	0	0	0	0	0	0
2003-08-23	1	1	1	1	0	0	0	0	0	0	0	0	0	0	0	0
2003-08-24	1	1	1	1	0	0	0	0	0	0	0	0	0	0	0	0
2003-08-25	1	1	1	1	0	0	0	0	0	0	0	0	0	0	0	0
2003-08-26	1	1	1	1	0	0	0	0	0	0	0	0	0	0	0	0
2003-08-27	1	1	1	1	0	0	0	0	0	0	0	0	0	0	0	0
2003-08-28	1	1	1	1	0	0	0	0	0	0	0	0	0	0	0	0
2003-08-29	1	1	1	1	0	0	0	0	0	0	0	0	0	0	0	0
2003-08-30	1	1	1	1	0	0	0	0	0	0	0	0	0	0	0	0
2003-08-31	1	1	1	1	0	0	0	0	0	0	0	0	0	0	0	0
2003-09-01	1	1	1	1	0	0	0	0	0	0	0	0	0	0	0	0
2003-09-02	1	1	1	1	0	0	0	0	0	0	0	0	0	0	0	0
2003-09-03	1	1	1	1	0	0	0	0	0	0	0	0	0	0	0	0
2003-09-04	1	1	1	1	0	0	0	0	0	0	0	0	0	0	0	0
2003-09-05	1	1	1	1	0	0	0	0	0	0	0	0	0	0	0	0
2003-09-06	1	1	1	1	0	0	0	0	0	0	0	0	0	0	0	0
2003-09-07	1	1	1	1	0	0	0	0	0	0	0	0	0	0	0	0
2003-09-08	1	1	1	1	0	0	0	0	0	0	0	0	0	0	0	0
2003-09-09	1	1	1	1	0	0	0	0	0	0	0	0	0	0	0	0
2003-09-10	1	1	1	1	0	0	0	0	0	0	0	0	0	0	0	0
2003-09-11	1	1	1	1	0	0	0	0	0	0	0	0	0	0	0	0
2003-09-12	1	1	1	1	0	0	0	0	0	0	0	0	0	0	0	0
2003-09-13	1	1	1	1	0	0	0	0	0	0	0	0	0	0	0	0
2003-09-14	1	1	1	1	0	0	0	0	0	0	0	0	0	0	0	0
2003-09-15	1	1	1	1	0	0	0	0	0	0	0	0	0	0	0	0
2003-09-16	1	1	1	1	0	0	0	0	0	0	0	0	0	0	0	0
2003-09-17	1	1	1	1	0	0	0	0	0	0	0	0	0	0	0	0
2003-09-18	1	1	1	1	0	0	0	0	0	0	0	0	0	0	0	0
2003-09-19	1	1	1	1	0	0	0	0	0	0	0	0	0	0	0	0
2003-09-20	1	1	1	1	0	0	0	0	0	0	0	0	0	0	0	0
2003-09-21	1	1	1	1	0	0	0	0	0	0	0	0	0	0	0	0
2003-09-22	1	1	1	1	0	0	0	0	0	0	0	0	0	0	0	0
2003-09-23	1	1	1	1	0	0	0	0	0	0	0	0	0	0	0	0
2003-09-24	1	1	1	1	0	0	0	0	0	0	0	0	0	0	0	0
2003-09-25	1	1	1	1	0	0	0	0	0	0	0	0	0	0	0	0
2003-09-26	1	1	1	1	0	0	0	0	0	0	0	0	0	0	0	0
2003-09-27	1	1	1	1	0	0	0	0	0	0	0	0	0	0	0	0
2003-09-28	1	1	1	1	0	0	0	0	0	0	0	0	0	0	0	0
2003-09-29	1	1	1	1	0	0	0	0	0	0	0	0	0	0	0	0
2003-09-30	1	1	1	1	0	0	0	0	0	0	0	0	0	0	0	0
2003-10-01	1	1	1	1	0	0	0	0	0	0	0	0	0	0	0	0
2003-10-02	1	1	1	1	0	0	0	0	0	0	0	0	0	0	0	0
2003-10-03	1	1	1	1	0	0	0	0	0	0	0	0	0	0	0	0
2003-10-04	1	1	1	1	0	0	0	0	0	0	0	0	0	0	0	0
2003-10-05	1	1	1	1	0	0	0	0	0	0	0	0	0	0	0	0
2003-10-06	1	1	1	1	0	0	0	0	0	0	0	0	0	0	0	0
2003-10-07	1	1	1	1	0	0	0	0	0	0	0	0	0	0	0	0
2003-10-08	1	1	1	1	0	0	0	0	0	0	0	0	0	0	0	0
2003-10-09	1	1	1	1	0	0	0	0	0	0	0	0	0	0	0	0
2003-10-10	1	1	1	1	0	0	0	0	0	0	0	0	0	0	0	0
2003-10-11	1	1	1	1	0	0	0	0	0	0	0	0	0	0	0	0
2003-10-12	1	1	1	1	0	0	0	0	0	0	0	0	0	0	0	0
2003-10-13	1	1	1	1	0	0	0	0	0	0	0	0	0	0	0	0
2003-10-14	1	1	1	1	0	0	0	0	0	0	0	0	0	0	0	0
2003-10-15	1	1	1	1	0	0	0	0	0	0	0	0	0	0	0	0
2003-10-16	1	1	1	1	0	0	0	0	0	0	0	0	0	0	0	0
2003-10-17	1	1	1	1	0	0	0	0	0	0	0	0	0	0	0	0
2003-10-18	1	1	1	1	0	0	0	0	0	0	0	0	0	0	0	0
2003-10-19	1	1	1	1	0	0	0	0	0	0	0	0	0	0	0	0
2003-10-20	1	1	1	1	0	0	0	0	0	0	0	0	0	0	0	0
2003-10-21	1	1	1	1	0	0	0	0	0	0	0	0	0	0	0	0
2003-10-22	1	1	1	1	0	0	0	0	0	0	0	0	0	0	0	0
2003-10-23	1	1	1	1	0	0	0	0	0	0	0	0	0	0	0	0
2003-10-24	1	1	1	1	0	0	0	0	0	0	0	0	0	0	0	0
2003-10-25	1	1	1	1	0	0	0	0	0	0	0	0	0	0	0	0
2003-10-26	1	1	1	1	0	0	0	0	0	0	0	0	0	0	0	0
2003-10-27	1	1	1	1	0	0	0	0	0	0	0	0	0	0	0	0
2003-10-28	1	1	1	1	0	0	0	0	0	0	0	0	0	0	0	0
2003-10-29	1	1	1	1	0	0	0	0	0	0	0	0	0	0	0	0
2003-10-30	1	1	1	1	0	0	0	0	0	0	0	0	0	0	0	0
2003-10-31	1	1	1	1	0	0	0	0	0	0	0	0	0	0	0	0
2003-11-01	1	1	1	1	0	0	0	0	0	0	0	0	0	0	0	0
2003-11-02	1	1	1	1	0	0	0	0	0	0	0	0	0	0	0	0
2003-11-03	1	1	1	1	0	0	0	0	0	0	0	0	0	0	0	0
2003-11-04	1	1	1	1	0	0	0	0	0	0	0	0	0	0	0	0
2003-11-05	1	1	1	1	0	0	0	0	0	0	0	0	0	0	0	0
2003-11-06	1	1	1	1	0	0	0	0	0	0	0	0	0	0	0	0
2003-11-07	1	1	1	1	0	0	0	0	0	0	0	0	0	0	0	0
2003-11-08	1	1	1	1	0	0	0	0	0	0	0	0	0	0	0	0
2003-11-09	1	1	1	1	0	0	0	0	0	0	0	0	0	0	0	0
2003-11-10	1	1	1	1	0	0	0	0	0	0	0	0	0	0	0	0
2003-11-11	1	1	1	1	0	0	0	0	0	0	0	0	0	0	0	0
2003-11-12	1	1	1	1	0	0	0	0	0	0	0	0	0	0	0	0
2003-11-13	1	1	1	1	0	0	0	0	0	0	0	0	0	0	0	0
2003-11-14	1	1	1	1	0	0	0	0	0	0	0	0	0	0	0	0
2003-11-15	1	1	1	1	0	0	0	0	0	0	0	0	0	0	0	0
2003-11-16	1	1	1	1	0	0	0	0	0	0	0	0	0	0	0	0
2003-11-17	1	1	1	1	0	0	0	0	0	0	0	0	0	0	0	0
2003-11-18	1	1	1	1	0	0	0	0	0	0	0	0	0	0	0	0
2003-11-19	1	1	1	1	0	0	0	0	0	0	0	0	0	0	0	0
2003-11-20	1	1	1	1	0	0	0	0	0	0	0	0	0	0	0	0
2003-11-21	1	1	1	1	0	0	0	0	0	0	0	0	0	0	0	0
2003-11-22	1	1	1	1	0	0	0	0	0	0	0	0	0	0	0	0
2003-11-23	1	1	1	1	0	0	0	0	0	0	0	0	0	0	0	0
2003-11-24	1	1	1	1	0	0	0	0	0	0	0	0	0	0	0	0
2003-11-25	1	1	1	1	0	0	0	0	0	0	0	0	0	0	0	0
2003-11-26	1	1	1	1	0	0	0	0	0	0	0	0	0	0	0	0
2003-11-27	1	1	1	1	0	0	0	0	0	0	0	0	0	0	0	0
2003-11-28	1	1	1	1	0	0	0	0	0	0	0	0	0	0	0	0
2003-11-29	1	1	1	1	0	0	0	0	0	0	0	0	0	0	0	0
2003-11-30	1	1	1	1	0	0	0	0	0	0	0	0	0	0	0	0
2003-12-01	1	1	1	1	0	0	0	0	0	0	0	0	0	0	0	0
2003-12-02	1	1	1	1	0	0	0	0	0	0	0	0	0	0	0	0
2003-12-03	1	1	1	1	0	0	0	0	0	0	0	0	0	0	0	0
2003-12-04	1	1	1	1	0	0	0	0	0	0	0	0	0	0	0	0
2003-12-05	1	1	1	1	0	0	0	0	0	0	0	0	0	0	0	0
2003-12-06	1	1	1	1	0	0	0	0	0	0	0	0	0	0	0	0
2003-12-07	1	1	1	1	0	0	0	0	0	0	0	0	0	0	0	0
2003-12-08	1	1	1	1	0	0	0	0	0	0	0	0	0	0	0	0
2003-12-09	1	1	1	1	0	0	0	0	0	0	0	0	0	0	0	0
2003-12-10	1	1	1	1	0	0	0	0	0	0	0	0	0	0	0	0
2003-12-11	1	1	1	1	0	0	0	0	0	0	0	0	0	0	0	0
2003-12-12	1	1	1	1	0	0	0	0	0	0	0	0	0	0	0	0
2003-12-13	1	1	1	1	0	0	0	0	0	0	0	0	0	0	0	0
2003-12-14	1	1	1	1	0	0	0	0	0	0	0	0	0	0	0	0
2003-12-15	1	1	1	1	0	0	0	0	0	0	0	0	0	0	0	0
2003-12-16	1	1	1	1	0	0	0	0	0	0	0	0	0	0	0	0
2003-12-17	1	1	1	1	0	0	0	0	0	0	0	0	0	0	0	0
2003-12-18	1	1	1	1	0	0	0	0	0	0	0	0	0	0	0	0
2003-12-19	1	1	1	1	0	0	0	0	0	0	0	0	0	0	0	0
2003-12-20	1	1	1	1	0	0	0	0	0	0	0	0	0	0	0	0
2003-12-21	1	1	1	1	0	0	0	0	0	0	0	0	0	0	0	0
2003-12-22	1	1	1	1	0	0	0	0	0	0	0	0	0	0	0	0
2003-12-23	1	1	1	1	0	0	0	0	0	0	0	0	0	0	0	0
2003-12-24	1	1	1	1	0	0	0	0	0	0	0	0	0	0	0	0
2003-12-25	1	1	1	1	0	0	0	0	0	0	0	0	0	0	0	0
2003-12-26	1	1	1	1	0	0	0	0	0	0	0	0	0	0	0	0
2003-12-27	1	1	1	1	0	0	0	0	0	0	0	0	0	0	0	0
2003-12-28	1	1	1	1	0	0	0	0	0	0	0	0	0	0	0	0
2003-12-29	1	1	1	1	0	0	0	0	0	0	0	0	0	0	0	0
2003-12-30	1	1	1	1	0	0	0	0	0	0	0	0	0	0	0	0
2003-12-31	1	1	1	1	0	0	0	0	0	0	0	0	0	0	0	0
2004-01-01	1	1	1	1	0	0	0	0	0	0	0	0	0	0	0	0
2004-01-02	1	1	1	1	0	0	0	0	0	0	0	0	0	0	0	0
2004-01-03	1	1	1	1	0	0	0	0	0	0	0	0	0	0	0	0
2004-01-04	1	1	1	1	0	0	0	0	0	0	0	0	0	0	0	0
2004-01-05	1	1	1	1	0	0	0	0	0	0	0	0	0	0	0	0
2004-01-06	1	1	1	1	0	0	0	0	0	0	0	0	0	0	0	0
2004-01-07	1	1	1	1	0	0	0	0	0	0	0	0	0	0	0	0
2004-01-08	1	1	1	1	0	0	0	0	0	0	0	0	0	0	0	0
2004-01-09	1	1	1	1	0	0	0	0	0	0	0	0	0	0	0	0
2004-01-10	1	1	1	1	0	0	0	0	0	0	0	0	0	0	0	0
2004-01-11	1	1	1	1	0	0	0	0	0	0	0	0	0	0	0	0
2004-01-12	1	1	1	1	0	0	0	0	0	0	0	0	0	0	0	0
2004-01-13	1	1	1	1	0	0	0	0	0	0	0	0	0	0	0	0
2004-01-14	1	1	1	1	0	0	0	0	0	0	0	0	0	0	0	0
2004-01-15	1	1	1	1	0	0	0	0	0	0	0	0	0	0	0	0
2004-01-16	1	1	1	1	0	0	0	0	0	0	0	0	0	0	0	0
2004-01-17	1	1	1	1	0	0	0	0	0	0	0	0	0	0	0	0
2004-01-18	1	1	1	1	0	0	0	0	0	0	0	0	0	0	0	0
2004-01-19	1	1	1	1	0	0	0	0	0	0	0	0	0	0	0	0
2004-01-20	1	1	1	1	0	0	0	0	0	0	0	0	0	0	0	0
2004-01-21	1	1	1	1	0	0	0	0	0	0	0	0	0	0	0	0
2004-01-22	1	1	1	1	0	0	0	0	0	0	0	0	0	0	0	0
2004-01-23	1	1	1	1	0	0	0	0	0	0	0	0	0	0	0	0
2004-01-24	1	1	1	1	0	0	0	0	0	0	0	0	0	0	0	0
2004-01-25	1	1	1	1	0	0	0	0	0	0	0	0	0	0	0	0
2004-01-26	1	1	1	1	0	0	0	0	0	0	0	0	0	0	0	0
2004-01-27	1	1	1	1	0	0	0	0	0	0	0	0	0	0	0	0
2004-01-28	1	1	1	1	0	0	0	0	0	0	0	0	0	0	0	0
2004-01-29	1	1	1	1	0	0	0	0	0	0	0	0	0	0	0	0
2004-01-30	1	1	1	1	0	0	0	0	0	0	0	0	0	0	0	0
2004-01-31	1	1	1	1	0	0	0	0	0	0	0	0	0	0	0	0
2004-02-01	1	1	1	1	0	0	0	0	0	0	0	0	0	0	0	0
2004-02-02	1	1	1	1	0	0	0	0	0	0	0	0	0	0	0	0
2004-02-03	1	1	1	1	0	0	0	0	0	0	0	0	0	0	0	0
2004-02-04	1	1	1	1	0	0	0	0	0	0	0	0	0	0	0	0
2004-02-05	1	1	1	1	0	0	0	0	0	0	0	0	0	0	0	0
2004-02-06	1	1	1	1	0	0	0	0	0	0	0	0	0	0	0	0
2004-02-07	1	1	1	1	0	0	0	0	0	0	0	0	0	0	0	0
2004-02-08	1	1	1	1	0	0	0	0	0	0	0	0	0	0	0	0
2004-02-09	1	1	1	1	0	0	0	0	0	0	0	0	0	0	0	0
2004-02-10	1	1	1	1	0	0	0	0	0	0	0	0	0	0	0	0
2004-02-11	1	1	1	1	0	0	0	0	0	0	0	0	0	0	0	0
2004-02-12	1	1	1	1	0	0	0	0	0	0	0	0	0	0	0	0
2004-02-13	1	1	1	1	0	0	0	0	0	0	0	0	0	0	0	0
2004-02-14	1	1	1	1	0	0	0	0	0	0	0	0	0	0	0	0
2004-02-15	1	1	1	1	0	0	0	0	0	0	0	0	0	0	0	0
2004-02-16	1	1	1	1	0	0	0	0	0	0	0	0	0	0	0	0
2004-02-17	1	1	1	1	0	0	0	0	0	0	0	0	0	0	0	0
2004-02-18	1	1	1	1	0	0	0	0	0	0	0	0	0	0	0	0
2004-02-19	1	1	1	1	0	0	0	0	0	0	0	0	0	0	0	0
2004-02-20	1	1	1	1	0	0	0	0	0	0	0	0	0	0	0	0
2004-02-21	1	1	1	1	0	0	0	0	0	0	0	0	0	0	0	0
2004-02-22	1	1	1	1	0	0	0	0	0	0	0	0	0	0	0	0
2004-02-23	1	1	1	1	0	0	0	0	0	0	0	0	0	0	0	0
2004-02-24	1	1	1	1	0	0	0	0	0	0	0	0	0	0	0	0
2004-02-25	1	1	1	1	0	0	0	0	0	0	0	0	0	0	0	0
2004-02-26	1	1	1	1	0	0	0	0	0	0	0	0	0	0	0	0
2004-02-27	1	1	1	1	0	0	0	0	0	0	0	0	0	0	0	0
2004-02-28	1	1	1	1	0	0	0	0	0	0	0	0	0	0	0	0
2004-02-29	1	1	1	1	0	0	0	0	0	0	0	0	0	0	0	0
2004-03-01	1	1	1	1	0	0	0	0	0	0	0	0	0	0	0	0
2004-03-02	1	1	1	1	0	0	0	0	0	0	0	0	0	0	0	0
2004-03-03	1	1	1	1	0	0	0	0	0	0	0	0	0	0	0	0
2004-03-04	1	1	1	1	0	0	0	0	0	0	0	0	0	0	0	0
2004-03-05	1	1	1	1	0	0	0	0	0	0	0	0	0	0	0	0
2004-03-06	1	1	1	1	0	0	0	0	0	0	0	0	0	0	0	0
2004-03-07	1	1	1	1	0	0	0	0	0	0	0	0	0	0	0	0
2004-03-08	1	1	1	1	0	0	0	0	0	0	0	0	0	0	0	0
2004-03-09	1	1	1	1	0	0	0	0	0	0	0	0	0	0	0	0
2004-03-10	1	1	1	1	0	0	0	0	0	0	0	0	0	0	0	0
2004-03-11	1	1	1	1	0	0	0	0	0	0	0	0	0	0	0	0
2004-03-12	1	1	1	1	0	0	0	0	0	0	0	0	0	0	0	0
2004-03-13	1	1	1	1	0	0	0	0	0	0	0	0	0	0	0	0
2004-03-14	1	1	1	1	0	0	0	0	0	0	0	0	0	0	0	0
2004-03-15	1	1	1	1	0	0	0	0	0	0	0	0	0	0	0	0
2004-03-16	1	1	1	1	0	0	0	0	0	0	0	0	0	0	0	0
2004-03-17	1	1	1	1	0	0	0	0	0	0	0	0	0	0	0	0
2004-03-18	1	1	1	1	0	0	0	0	0	0	0	0	0	0	0	0
2004-03-19	1	1	1	1	0	0	0	0	0	0	0	0	0	0	0	0
2004-03-20	1	1	1	1	0	0	0	0	0	0	0	0	0	0	0	0
2004-03-21	1	1	1	1	0	0	0	0	0	0	0	0	0	0	0	0
2004-03-22	1	1	1	1	0	0	0	0	0	0	0	0	0	0	0	0
2004-03-23	1	1	1	1	0	0	0	0	0	0	0	0	0	0	0	0
2004-03-24	1	1	1	1	0	0	0	0	0	0	0	0	0	0	0	0
2004-03-25	1	1	1	1	0	0	0	0	0	0	0	0	0	0	0	0
2004-03-26	1	1	1	1	0	0	0	0	0	0	0	0	0	0	0	0
2004-03-27	1	1	1	1	0	0	0	0	0	0	0	0	0	0	0	0
2004-03-28	1	1	1	1	0	0	0	0	0	0	0	0	0	0	0	0
2004-03-29	1	1	1	1	0	0	0	0	0	0	0	0	0	0	0	0
2004-03-30	1	1	1	1	0	0	0	0	0	0	0	0	0	0	0	0
2004-03-31	1	1	1	1	0	0	0	0	0	0	0	0	0	0	0	0
2004-04-01	1	1	1	1	0	0	0	0	0	0	0	0	0	0	0	0
2004-04-02	1	1	1	1	0	0	0	0	0	0	0	0	0	0	0	0
2004-04-03	1	1	1	1	0	0	0	0	0	0	0	0	0	0	0	0
2004-04-04	1	1	1	1	0	0	0	0	0	0	0	0	0	0	0	0
2004-04-05	1	1	1	1	0	0	0	0	0	0	0	0	0	0	0	0
2004-04-06	1	1	1	1	0	0	0	0	0	0	0	0	0	0	0	0
2004-04-07	1	1	1	1	0	0	0	0	0	0	0	0	0	0	0	0
2004-04-08	1	1	1	1	0	0	0	0	0	0	0	0	0	0	0	0
2004-04-09	1	1	1	1	0	0	0	0	0	0	0	0	0	0	0	0
2004-04-10	1	1	1	1	0	0	0	0	0	0	0	0	0	0	0	0
2004-04-11	1	1	1	1	0	0	0	0	0	0	0	0	0	0	0	0
2004-04-12	1	1	1	1	0	0	0	0	0	0	0	0	0	0	0	0
2004-04-13	1	1	1	1	0	0	0	0	0	0	0	0	0	0	0	0
2004-04-14	1	1	1	1	0	0	0	0	0	0	0	0	0	0	0	0
2004-04-15	1	1	1	1	0	0	0	0	0	0	0	0	0	0	0	0
2004-04-16	1	1	1	1	0	0	0	0	0	0	0	0	0	0	0	0
2004-04-17	1	1	1	1	0	0	0	0	0	0	0	0	0	0	0	0
2004-04-18	1	1	1	1	0	0	0	0	0	0	0	0	0	0	0	0
2004-04-19	1	1	1	1	0	0	0	0	0	0	0	0	0	0	0	0
2004-04-20	1	1	1	1	0	0	0	0	0	0	0	0	0	0	0	0
2004-04-21	1	1	1	1	0	0	0	0	0	0	0	0	0	0	0	0
2004-04-22	1	1	1	1	0	0	0	0	0	0	0	0	0	0	0	0
2004-04-23	1	1	1	1	0	0	0	0	0	0	0	0	0	0	0	0
2004-04-24	1	1	1	1	0	0	0	0	0	0	0	0	0	0	0	0
2004-04-25	1	1	1	1	0	0	0	0	0	0	0	0	0	0	0	0
2004-04-26	1	1	1	1	0	0	0	0	0	0	0	0	0	0	0	0
2004-04-27	1	1	1	1	0	0	0	0	0	0	0	0	0	0	0	0
2004-04-28	1	1	1	1	0	0	0	0	0	0	0	0	0	0	0	0
2004-04-29	1	1	1	1	0	0	0	0	0	0	0	0	0	0	0	0
2004-04-30	1	1	1	1	0	0	0	0	0	0	0	0	0	0	0	0
2004-05-01	1	1	1	1	0	0	0	0	0	0	0	0	0	0	0	0
2004-05-02	1	1	1	1	0	0	0	0	0	0	0	0	0	0	0	0
2004-05-03	1	1	1	1	0	0	0	0	0	0	0	0	0	0	0	0
2004-05-04	1	1	1	1	0	0	0	0	0	0	0	0	0	0	0	0
2004-05-05	1	1	1	1	0	0	0	0	0	0	0	0	0	0	0	0
2004-05-06	1	1	1	1	0	0	0	0	0	0	0	0	0	0	0	0
2004-05-07	1	1	1	1	0	0	0	0	0	0	0	0	0	0	0	0
2004-05-08	1	1	1	1	0	0	0	0	0	0	0	0	0	0	0	0
2004-05-09	1	1	1	1	0	0	0	0	0	0	0	0	0	0	0	0
2004-05-10	1	1	1	1	0	0	0	0	0	0	0	0	0	0	0	0
2004-05-11	1	1	1	1	0	0	0	0	0	0	0	0	0	0	0	0
2004-05-12	1	1	1	1	0	0	0	0	0	0	0	0	0	0	0	0
2004-05-13	1	1	1	1	0	0	0	0	0	0	0	0	0	0	0	0
2004-05-14	1	1	1	1	0	0	0	0	0	0	0	0	0	0	0	0
2004-05-15	1	1	1	1	0	0	0	0	0	0	0	0	0	0	0	0
2004-05-16	1	1	1	1	0	0	0	0	0	0	0	0	0	0	0	0
2004-05-17	1	1	1	1	0	0	0	0	0	0	0	0	0	0	0	0
2004-05-18	1	1	1	1	0	0	0	0	0	0	0	0	0	0	0	0
2004-05-19	1	1	1	1	0	0	0	0	0	0	0	0	0	0	0	0
2004-05-20	1	1	1	1	0	0	0	0	0	0	0	0	0	0	0	0
2004-05-21	1	1	1	1	0	0	0	0	0	0	0	0	0	0	0	0
2004-05-22	1	1	1	1	0	0	0	0	0	0	0	0	0	0	0	0
2004-05-23	1	1	1	1	0	0	0	0	0	0	0	0	0	0	0	0
2004-05-24	1	1	1	1	0	0	0	0	0	0	0	0	0	0	0	0
2004-05-25	1	1	1	1	0	0	0	0	0	0	0	0	0	0	0	0
2004-05-26	1	1	1	1	0	0	0	0	0	0	0	0	0	0	0	0
2004-05-27	1	1	1	1	0	0	0	0	0	0	0	0	0	0	0	0
2004-05-28	1	1	1	1	0	0	0	0	0	0	0	0	0	0	0	0
2004-05-29	1	1	1	1	0	0	0	0	0	0	0	0	0	0	0	0
2004-05-30	1	1	1	1	0	0	0	0	0	0	0	0	0	0	0	0
2004-05-31	1	1	1	1	0	0	0	0	0	0	0	0	0	0	0	0
2004-06-01	1	1	1	1	0	0	0	0	0	0	0	0	0	0	0	0
2004-06-02	1	1	1	1	0	0	0	0	0	0	0	0	0	0	0	0
2004-06-03	1	1	1	1	0	0	0	0	0	0	0	0	0	0	0	0
2004-06-04	1	1	1	1	0	0	0	0	0	0	0	0	0	0	0	0
2004-06-05	1	1	1	1	0	0	0	0	0	0	0	0	0	0	0	0
2004-06-06	1	1	1	1	0	0	0	0	0	0	0	0	0	0	0	0
2004-06-07	1	1	1	1	0	0	0	0	0	0	0	0	0	0	0	0
2004-06-08	1	1	1	1	0	0	0	0	0	0	0	0	0	0	0	0
2004-06-09	1	1	1	1	0	0	0	0	0	0	0	0	0	0	0	0
2004-06-10	1	1	1	1	0	0	0	0	0	0	0	0	0	0	0	0
2004-06-11	1	1	1	1	0	0	0	0	0	0	0	0	0	0	0	0
2004-06-12	1	1	1	1	0	0	0	0	0	0	0	0	0	0	0	0
2004-06-13	1	1	1	1	0	0	0	0	0	0	0	0	0	0	0	0
2004-06-14	1	1	1	1	0	0	0	0	0	0	0	0	0	0	0	0
2004-06-15	1	1	1	1	0	0	0	0	0	0	0	0	0	0	0	0
2004-06-16	1	1	1	1	0	0	0	0	0	0	0	0	0	0	0	0
2004-06-17	1	1	1	1	0	0	0	0	0	0	0	0	0	0	0	0
2004-06-18	1	1	1	1	0	0	0	0	0	0	0	0	0	0	0	0
2004-06-19	1	1	1	1	0	0	0	0	0	0	0	0	0	0	0	0
2004-06-20	1	1	1	1	0	0	0	0	0	0	0	0	0	0	0	0
2004-06-21	1	1	1	1	0	0	0	0	0	0	0	0	0	0	0	0
2004-06-22	1	1	1	1	0	0	0	0	0	0	0	0	0	0	0	0
2004-06-23	1	1	1	1	0	0	0	0	0	0	0	0	0	0	0	0
2004-06-24	1	0	1	1	0	0	0	0	0	0	0	0	0	0	0	0
2004-06-25	1	1	1	1	0	0	0	0	0	0	0	0	0	0	0	0
2004-06-26	1	1	1	1	0	0	0	0	0	0	0	0	0	0	0	0
2004-06-27	1	1	1	1	0	0	0	0	0	0	0	0	0	0	0	0
2004-06-28	1	1	1	1	0	0	0	0	0	0	0	0	0	0	0	0
2004-06-29	1	0	1	1	0	0	0	0	0	0	0	0	0	0	0	0
2004-06-30	1	1	1	1	0	0	0	0	0	0	0	0	0	0	0	0
2004-07-01	1	1	1	1	0	0	0	0	0	0	0	0	0	0	0	0
2004-07-02	1	1	1	1	0	0	0	0	0	0	0	0	0	0	0	0
2004-07-03	1	1	1	1	0	0	0	0	0	0	0	0	0	0	0	0
2004-07-04	1	1	1	1	0	0	0	0	0	0	0	0	0	0	0	0
2004-07-05	1	1	1	1	0	0	0	0	0	0	0	0	0	0	0	0
2004-07-06	1	0	1	1	0	0	0	0	0	0	0	0	0	0	0	0
2004-07-07	1	0	1	1	0	0	0	0	0	0	0	0	0	0	0	0
2004-07-08	1	0	1	1	0	0	0	0	0	0	0	0	0	0	0	0
2004-07-09	1	0	1	1	0	0	0	0	0	0	0	0	0	0	0	0
2004-07-10	1	0	1	1	0	0	0	0	0	0	0	0	0	0	0	0
2004-07-11	1	0	1	1	0	0	0	0	0	0	0	0	0	0	0	0
2004-07-12	1	0	1	1	0	0	0	0	0	0	0	0	0	0	0	0
2004-07-13	1	0	1	1	0	0	0	0	0	0	0	0	0	0	0	0
2004-07-14	1	1	1	1	0	0	0	0	0	0	0	0	0	0	0	0
2004-07-15	1	1	1	1	0	0	0	0	0	0	0	0	0	0	0	0
2004-07-16	1	1	1	1	0	0	0	0	0	0	0	0	0	0	0	0
2004-07-17	1	1	1	1	0	0	0	0	0	0	0	0	0	0	0	0
2004-07-18	1	1	1	1	0	0	0	0	0	0	0	0	0	0	0	0
2004-07-19	1	1	1	1	0	0	0	0	0	0	0	0	0	0	0	0
2004-07-20	1	1	1	1	0	0	0	0	0	0	0	0	0	0	0	0
2004-07-21	1	1	1	1	0	0	0	0	0	0	0	0	0	0	0	0
2004-07-22	1	1	1	1	0	0	0	0	0	0	0	0	0	0	0	0
2004-07-23	1	1	1	1	0	0	0	0	0	0	0	0	0	0	0	0
2004-07-24	1	1	1	1	0	0	0	0	0	0	0	0	0	0	0	0
2004-07-25	1	1	1	1	0	0	0	0	0	0	0	0	0	0	0	0
2004-07-26	1	1	1	1	0	0	0	0	0	0	0	0	0	0	0	0
2004-07-27	1	1	1	1	0	0	0	0	0	0	0	0	0	0	0	0
2004-07-28	1	1	1	1	0	0	0	0	0	0	0	0	0	0	0	0
2004-07-29	1	1	1	1	0	0	0	0	0	0	0	0	0	0	0	0
2004-07-30	1	1	1	1	0	0	0	0	0	0	0	0	0	0	0	0
2004-07-31	1	1	1	1	0	0	0	0	0	0	0	0	0	0	0	0
2004-08-01	1	1	1	1	0	0	0	0	0	0	0	0	0	0	0	0
2004-08-02	1	1	1	1	0	0	0	0	0	0	0	0	0	0	0	0
2004-08-03	1	1	1	1	0	0	0	0	0	0	0	0	0	0	0	0
2004-08-04	1	1	1	1	0	0	0	0	0	0	0	0	0	0	0	0
2004-08-05	1	1	1	1	0	0	0	0	0	0	0	0	0	0	0	0
2004-08-06	1	1	1	1	0	0	0	0	0	0	0	0	0	0	0	0
2004-08-07	1	1	1	1	0	0	0	0	0	0	0	0	0	0	0	0
2004-08-08	1	1	1	1	0	0	0	0	0	0	0	0	0	0	0	0
2004-08-09	1	1	1	1	0	0	0	0	0	0	0	0	0	0	0	0
2004-08-10	1	1	1	1	0	0	0	0	0	0	0	0	0	0	0	0
2004-08-11	1	1	1	1	0	0	0	0	0	0	0	0	0	0	0	0
2004-08-12	1	1	1	1	0	0	0	0	0	0	0	0	0	0	0	0
2004-08-13	1	1	1	1	0	0	0	0	0	0	0	0	0	0	0	0
2004-08-14	1	1	1	1	0	0	0	0	0	0	0	0	0	0	0	0
2004-08-15	1	1	1	1	0	0	0	0	0	0	0	0	0	0	0	0
2004-08-16	1	1	1	1	0	0	0	0	0	0	0	0	0	0	0	0
2004-08-17	1	1	1	1	0	0	0	0	0	0	0	0	0	0	0	0
2004-08-18	1	1	1	1	0	0	0	0	0	0	0	0	0	0	0	0
2004-08-19	1	1	1	1	0	0	0	0	0	0	0	0	0	0	0	0
2004-08-20	1	1	1	1	0	0	0	0	0	0	0	0	0	0	0	0
2004-08-21	1	1	1	1	0	0	0	0	0	0	0	0	0	0	0	0
2004-08-22	1	1	1	1	0	0	0	0	0	0	0	0	0	0	0	0
2004-08-23	1	1	1	1	0	0	0	0	0	0	0	0	0	0	0	0
2004-08-24	1	1	1	1	0	0	0	0	0	0	0	0	0	0	0	0
2004-08-25	1	1	1	1	0	0	0	0	0	0	0	0	0	0	0	0
2004-08-26	1	1	1	1	0	0	0	0	0	0	0	0	0	0	0	0
2004-08-27	1	1	1	1	0	0	0	0	0	0	0	0	0	0	0	0
2004-08-28	1	1	1	1	0	0	0	0	0	0	0	0	0	0	0	0
2004-08-29	1	1	1	1	0	0	0	0	0	0	0	0	0	0	0	0
2004-08-30	1	1	1	1	0	0	0	0	0	0	0	0	0	0	0	0
2004-08-31	1	1	1	1	0	0	0	0	0	0	0	0	0	0	0	0
2004-09-01	1	1	1	1	0	0	0	0	0	0	0	0	0	0	0	0
2004-09-02	1	1	1	1	0	0	0	0	0	0	0	0	0	0	0	0
2004-09-03	1	1	1	1	0	0	0	0	0	0	0	0	0	0	0	0
2004-09-04	1	1	1	1	0	0	0	0	0	0	0	0	0	0	0	0
2004-09-05	1	1	1	1	0	0	0	0	0	0	0	0	0	0	0	0
2004-09-06	1	1	1	1	0	0	0	0	0	0	0	0	0	0	0	0
2004-09-07	1	1	1	1	0	0	0	0	0	0	0	0	0	0	0	0
2004-09-08	1	1	1	1	0	0	0	0	0	0	0	0	0	0	0	0
2004-09-09	1	1	1	1	0	0	0	0	0	0	0	0	0	0	0	0
2004-09-10	1	1	1	1	0	0	0	0	0	0	0	0	0	0	0	0
2004-09-11	1	1	1	1	0	0	0	0	0	0	0	0	0	0	0	0
2004-09-12	1	1	1	1	0	0	0	0	0	0	0	0	0	0	0	0
2004-09-13	1	1	1	1	0	0	0	0	0	0	0	0	0	0	0	0
2004-09-14	1	1	1	1	0	0	0	0	0	0	0	0	0	0	0	0
2004-09-15	1	1	1	1	0	0	0	0	0	0	0	0	0	0	0	0
2004-09-16	1	1	1	1	0	0	0	0	0	0	0	0	0	0	0	0
2004-09-17	1	1	1	1	0	0	0	0	0	0	0	0	0	0	0	0
2004-09-18	1	1	1	1	0	0	0	0	0	0	0	0	0	0	0	0
2004-09-19	1	1	1	1	0	0	0	0	0	0	0	0	0	0	0	0
2004-09-20	1	1	1	1	0	0	0	0	0	0	0	0	0	0	0	0
2004-09-21	1	1	1	1	0	0	0	0	0	0	0	0	0	0	0	0
2004-09-22	1	1	1	1	0	0	0	0	0	0	0	0	0	0	0	0
2004-09-23	1	1	1	1	0	0	0	0	0	0	0	0	0	0	0	0
2004-09-24	1	1	1	1	0	0	0	0	0	0	0	0	0	0	0	0
2004-09-25	1	1	1	1	0	0	0	0	0	0	0	0	0	0	0	0
2004-09-26	1	1	1	1	0	0	0	0	0	0	0	0	0	0	0	0
2004-09-27	1	1	1	1	0	0	0	0	0	0	0	0	0	0	0	0
2004-09-28	1	1	1	1	0	0	0	0	0	0	0	0	0	0	0	0
2004-09-29	1	1	1	1	0	0	0	0	0	0	0	0	0	0	0	0
2004-09-30	1	1	1	1	0	0	0	0	0	0	0	0	0	0	0	0
2004-10-01	1	1	1	1	0	0	0	0	0	0	0	0	0	0	0	0
2004-10-02	1	1	1	1	0	0	0	0	0	0	0	0	0	0	0	0
2004-10-03	1	1	1	1	0	0	0	0	0	0	0	0	0	0	0	0
2004-10-04	1	1	1	1	0	0	0	0	0	0	0	0	0	0	0	0
2004-10-05	1	1	1	1	0	0	0	0	0	0	0	0	0	0	0	0
2004-10-06	1	1	1	1	0	0	0	0	0	0	0	0	0	0	0	0
2004-10-07	1	1	1	1	0	0	0	0	0	0	0	0	0	0	0	0
2004-10-08	1	1	1	1	0	0	0	0	0	0	0	0	0	0	0	0
2004-10-09	1	1	1	1	0	0	0	0	0	0	0	0	0	0	0	0
2004-10-10	1	1	1	1	0	0	0	0	0	0	0	0	0	0	0	0
2004-10-11	1	1	1	1	0	0	0	0	0	0	0	0	0	0	0	0
2004-10-12	1	1	1	1	0	0	0	0	0	0	0	0	0	0	0	0
2004-10-13	1	1	1	1	0	0	0	0	0	0	0	0	0	0	0	0
2004-10-14	1	1	1	1	0	0	0	0	0	0	0	0	0	0	0	0
2004-10-15	1	1	1	1	0	0	0	0	0	0	0	0	0	0	0	0
2004-10-16	1	1	1	1	0	0	0	0	0	0	0	0	0	0	0	0
2004-10-17	1	1	1	1	0	0	0	0	0	0	0	0	0	0	0	0
2004-10-18	1	1	1	1	0	0	0	0	0	0	0	0	0	0	0	0
2004-10-19	1	1	1	1	0	0	0	0	0	0	0	0	0	0	0	0
2004-10-20	1	1	1	1	0	0	0	0	0	0	0	0	0	0	0	0
2004-10-21	1	1	1	1	0	0	0	0	0	0	0	0	0	0	0	0
2004-10-22	1	1	1	1	0	0	0	0	0	0	0	0	0	0	0	0
2004-10-23	1	1	1	1	0	0	0	0	0	0	0	0	0	0	0	0
2004-10-24	1	1	1	1	0	0	0	0	0	0	0	0	0	0	0	0
2004-10-25	1	1	1	1	0	0	0	0	0	0	0	0	0	0	0	0
2004-10-26	1	1	1	1	0	0	0	0	0	0	0	0	0	0	0	0
2004-10-27	1	1	1	1	0	0	0	0	0	0	0	0	0	0	0	0
2004-10-28	1	1	1	1	0	0	0	0	0	0	0	0	0	0	0	0
2004-10-29	1	1	1	1	0	0	0	0	0	0	0	0	0	0	0	0
2004-10-30	1	1	1	1	0	0	0	0	0	0	0	0	0	0	0	0
2004-10-31	1	1	1	1	0	0	0	0	0	0	0	0	0	0	0	0
2004-11-01	1	1	1	1	0	0	0	0	0	0	0	0	0	0	0	0
2004-11-02	1	1	1	1	0	0	0	0	0	0	0	0	0	0	0	0
2004-11-03	1	1	1	1	0	0	0	0	0	0	0	0	0	0	0	0
2004-11-04	1	1	1	1	1	0	0	0	0	0	0	0	0	0	0	0
2004-11-05	1	1	1	1	1	0	0	0	0	0	0	0	0	0	0	0
2004-11-06	1	1	1	1	0	0	0	0	0	0	0	0	0	0	0	0
2004-11-07	1	1	1	1	1	0	0	0	0	0	0	0	0	0	0	0
2004-11-08	1	1	1	1	1	0	0	0	0	0	0	0	0	0	0	0
2004-11-09	1	1	1	1	0	0	0	0	0	0	0	0	0	0	0	0
2004-11-10	1	1	1	1	1	0	0	0	0	0	0	0	0	0	0	0
2004-11-11	1	1	1	1	1	0	0	0	0	0	0	0	0	0	0	0
2004-11-12	1	1	1	1	1	0	0	0	0	0	0	0	0	0	0	0
2004-11-13	1	1	1	1	1	0	0	0	0	0	0	0	0	0	0	0
2004-11-14	1	1	1	1	1	0	0	0	0	0	0	0	0	0	0	0
2004-11-15	1	1	1	1	1	0	0	0	0	0	0	0	0	0	0	0
2004-11-16	1	1	1	1	1	0	0	0	0	0	0	0	0	0	0	0
2004-11-17	1	1	1	1	1	0	0	0	0	0	0	0	0	0	0	0
2004-11-18	1	1	1	1	1	0	0	0	0	0	0	0	0	0	0	0
2004-11-19	1	1	1	1	1	0	0	0	0	0	0	0	0	0	0	0
2004-11-20	1	1	1	1	1	0	0	0	0	0	0	0	0	0	0	0
2004-11-21	1	1	1	1	1	0	0	0	0	0	0	0	0	0	0	0
2004-11-22	1	1	1	1	1	0	0	0	0	0	0	0	0	0	0	0
2004-11-23	1	1	1	1	1	0	0	0	0	0	0	0	0	0	0	0
2004-11-24	1	1	1	1	1	0	0	0	0	0	0	0	0	0	0	0
2004-11-25	1	1	1	1	1	0	0	0	0	0	0	0	0	0	0	0
2004-11-26	1	1	1	1	1	0	0	0	0	0	0	0	0	0	0	0
2004-11-27	1	1	1	1	1	0	0	0	0	0	0	0	0	0	0	0
2004-11-28	1	1	1	1	1	0	0	0	0	0	0	0	0	0	0	0
2004-11-29	1	1	1	1	0	0	0	0	0	0	0	0	0	0	0	0
2004-11-30	1	1	1	1	1	0	0	0	0	0	0	0	0	0	0	0
2004-12-01	1	1	1	1	0	0	0	0	0	0	0	0	0	0	0	0
2004-12-02	1	1	1	1	1	0	0	0	0	0	0	0	0	0	0	0
2004-12-03	1	1	1	1	1	0	0	0	0	0	0	0	0	0	0	0
2004-12-04	1	1	1	1	0	0	0	0	0	0	0	0	0	0	0	0
2004-12-05	1	1	1	1	0	0	0	0	0	0	0	0	0	0	0	0
2004-12-06	1	1	1	1	0	0	0	0	0	0	0	0	0	0	0	0
2004-12-07	1	1	1	1	0	0	0	0	0	0	0	0	0	0	0	0
2004-12-08	1	1	0	1	1	0	0	0	0	0	0	0	0	0	0	0
2004-12-09	1	1	1	1	1	0	0	0	0	0	0	0	0	0	0	0
2004-12-10	1	1	1	1	1	0	0	0	0	0	0	0	0	0	0	0
2004-12-11	1	1	1	1	1	0	0	0	0	0	0	0	0	0	0	0
2004-12-12	1	1	1	1	1	0	0	0	0	0	0	0	0	0	0	0
2004-12-13	1	1	1	1	1	0	0	0	0	0	0	0	0	0	0	0
2004-12-14	1	1	1	1	1	0	0	0	0	0	0	0	0	0	0	0
2004-12-15	1	1	1	1	1	0	0	0	0	0	0	0	0	0	0	0
2004-12-16	1	1	1	1	1	0	0	0	0	0	0	0	0	0	0	0
2004-12-17	1	1	1	1	1	0	0	0	0	0	0	0	0	0	0	0
2004-12-18	1	1	1	1	1	0	0	0	0	0	0	0	0	0	0	0
2004-12-19	1	1	1	1	1	0	0	0	0	0	0	0	0	0	0	0
2004-12-20	1	1	1	1	1	0	0	0	0	0	0	0	0	0	0	0
2004-12-21	1	1	1	1	1	0	0	0	0	0	0	0	0	0	0	0
2004-12-22	1	1	1	1	0	0	0	0	0	0	0	0	0	0	0	0
2004-12-23	1	1	1	1	1	0	0	0	0	0	0	0	0	0	0	0
2004-12-24	1	1	1	1	1	0	0	0	0	0	0	0	0	0	0	0
2004-12-25	1	1	1	1	1	0	0	0	0	0	0	0	0	0	0	0
2004-12-26	1	1	1	1	1	0	0	0	0	0	0	0	0	0	0	0
2004-12-27	1	1	1	1	1	0	0	0	0	0	0	0	0	0	0	0
2004-12-28	1	1	1	1	1	0	0	0	0	0	0	0	0	0	0	0
2004-12-29	1	1	1	1	1	0	0	0	0	0	0	0	0	0	0	0
2004-12-30	1	1	1	1	1	0	0	0	0	0	0	0	0	0	0	0
2004-12-31	1	1	1	1	1	0	0	0	0	0	0	0	0	0	0	0
2005-01-01	1	1	1	1	1	0	0	0	0	0	0	0	0	0	0	0
2005-01-02	1	1	1	1	1	0	0	0	0	0	0	0	0	0	0	0
2005-01-03	1	1	1	1	1	0	0	0	0	0	0	0	0	0	0	0
2005-01-04	1	1	1	1	1	0	0	0	0	0	0	0	0	0	0	0
2005-01-05	1	1	1	1	1	0	0	0	0	0	0	0	0	0	0	0
2005-01-06	1	1	1	1	1	0	0	0	0	0	0	0	0	0	0	0
2005-01-07	1	1	1	1	1	0	0	0	0	0	0	0	0	0	0	0
2005-01-08	1	1	1	1	1	0	0	0	0	0	0	0	0	0	0	0
2005-01-09	1	1	1	1	1	0	0	0	0	0	0	0	0	0	0	0
2005-01-10	1	1	1	1	1	0	0	0	0	0	0	0	0	0	0	0
2005-01-11	1	1	1	1	1	0	0	0	0	0	0	0	0	0	0	0
2005-01-12	1	1	1	1	1	0	0	0	0	0	0	0	0	0	0	0
2005-01-13	1	1	1	1	1	0	0	0	0	0	0	0	0	0	0	0
2005-01-14	1	1	1	1	1	0	0	0	0	0	0	0	0	0	0	0
2005-01-15	1	1	1	1	1	0	0	0	0	0	0	0	0	0	0	0
2005-01-16	1	1	1	1	1	0	0	0	0	0	0	0	0	0	0	0
2005-01-17	1	1	1	1	1	0	0	0	0	0	0	0	0	0	0	0
2005-01-18	1	1	1	1	1	0	0	0	0	0	0	0	0	0	0	0
2005-01-19	1	1	1	1	1	0	0	0	0	0	0	0	0	0	0	0
2005-01-20	1	1	1	1	1	0	0	0	0	0	0	0	0	0	0	0
2005-01-21	1	1	1	1	1	0	0	0	0	0	0	0	0	0	0	0
2005-01-22	1	1	1	1	1	0	0	0	0	0	0	0	0	0	0	0
2005-01-23	1	1	1	1	1	0	0	0	0	0	0	0	0	0	0	0
2005-01-24	1	1	1	1	1	0	0	0	0	0	0	0	0	0	0	0
2005-01-25	1	1	1	1	1	0	0	0	0	0	0	0	0	0	0	0
2005-01-26	1	1	1	1	1	0	0	0	0	0	0	0	0	0	0	0
2005-01-27	1	1	1	1	1	0	0	0	0	0	0	0	0	0	0	0
2005-01-28	1	1	1	1	1	0	0	0	0	0	0	0	0	0	0	0
2005-01-29	1	1	1	1	0	0	0	0	0	0	0	0	0	0	0	0
2005-01-30	1	1	1	1	1	0	0	0	0	0	0	0	0	0	0	0
2005-01-31	1	1	1	1	1	0	0	0	0	0	0	0	0	0	0	0
2005-02-01	1	1	1	1	1	0	0	0	0	0	0	0	0	0	0	0
2005-02-02	1	1	1	1	1	0	0	0	0	0	0	0	0	0	0	0
2005-02-03	1	1	1	1	1	0	0	0	0	0	0	0	0	0	0	0
2005-02-04	1	1	1	1	0	0	0	0	0	0	0	0	0	0	0	0
2005-02-05	1	1	1	1	1	0	0	0	0	0	0	0	0	0	0	0
2005-02-06	1	1	1	1	1	0	0	0	0	0	0	0	0	0	0	0
2005-02-07	1	1	1	1	1	0	0	0	0	0	0	0	0	0	0	0
2005-02-08	1	1	1	1	0	0	0	0	0	0	0	0	0	0	0	0
2005-02-09	1	1	1	1	0	0	0	0	0	0	0	0	0	0	0	0
2005-02-10	1	1	0	1	0	0	0	0	0	0	0	0	0	0	0	0
2005-02-11	1	1	1	1	1	0	0	0	0	0	0	0	0	0	0	0
2005-02-12	1	1	1	1	1	0	0	0	0	0	0	0	0	0	0	0
2005-02-13	1	1	1	1	1	0	0	0	0	0	0	0	0	0	0	0
2005-02-14	1	1	1	1	1	0	0	0	0	0	0	0	0	0	0	0
2005-02-15	1	1	1	1	1	0	0	0	0	0	0	0	0	0	0	0
2005-02-16	1	1	1	1	1	0	0	0	0	0	0	0	0	0	0	0
2005-02-17	1	1	1	1	1	0	0	0	0	0	0	0	0	0	0	0
2005-02-18	1	1	1	1	1	0	0	0	0	0	0	0	0	0	0	0
2005-02-19	1	1	1	1	1	0	0	0	0	0	0	0	0	0	0	0
2005-02-20	1	1	1	1	1	0	0	0	0	0	0	0	0	0	0	0
2005-02-21	1	1	1	1	1	0	0	0	0	0	0	0	0	0	0	0
2005-02-22	1	1	1	1	1	0	0	0	0	0	0	0	0	0	0	0
2005-02-23	1	1	1	1	1	0	0	0	0	0	0	0	0	0	0	0
2005-02-24	1	1	1	1	1	0	0	0	0	0	0	0	0	0	0	0
2005-02-25	1	1	1	1	1	0	0	0	0	0	0	0	0	0	0	0
2005-02-26	1	1	1	1	1	0	0	0	0	0	0	0	0	0	0	0
2005-02-27	1	1	1	1	1	0	0	0	0	0	0	0	0	0	0	0
2005-02-28	1	1	1	1	1	0	0	0	0	0	0	0	0	0	0	0
2005-03-01	1	1	1	1	1	0	0	0	0	0	0	0	0	0	0	0
2005-03-02	1	1	1	1	0	0	0	0	0	0	0	0	0	0	0	0
2005-03-03	1	1	1	1	1	0	0	0	0	0	0	0	0	0	0	0
2005-03-04	0	0	1	1	1	0	0	0	0	0	0	0	0	0	0	0
2005-03-05	1	1	1	1	1	0	0	0	0	0	0	0	0	0	0	0
2005-03-06	1	1	1	1	1	0	0	0	0	0	0	0	0	0	0	0
2005-03-07	1	1	1	1	1	0	0	0	0	0	0	0	0	0	0	0
2005-03-08	1	1	1	1	1	0	0	0	0	0	0	0	0	0	0	0
2005-03-09	1	1	1	1	1	0	0	0	0	0	0	0	0	0	0	0
2005-03-10	1	1	1	1	1	0	0	0	0	0	0	0	0	0	0	0
2005-03-11	1	1	1	1	0	0	0	0	0	0	0	0	0	0	0	0
2005-03-12	1	1	1	1	1	0	0	0	0	0	0	0	0	0	0	0
2005-03-13	1	1	1	1	1	0	0	0	0	0	0	0	0	0	0	0
2005-03-14	1	1	1	1	1	0	0	0	0	0	0	0	0	0	0	0
2005-03-15	1	1	1	1	1	0	0	0	0	0	0	0	0	0	0	0
2005-03-16	0	1	1	1	1	0	0	0	0	0	0	0	0	0	0	0
2005-03-17	1	1	1	1	1	0	0	0	0	0	0	0	0	0	0	0
2005-03-18	1	1	1	1	1	0	0	0	0	0	0	0	0	0	0	0
2005-03-19	1	1	1	1	0	0	0	0	0	0	0	0	0	0	0	0
2005-03-20	1	1	1	1	1	0	0	0	0	0	0	0	0	0	0	0
2005-03-21	1	1	1	1	0	0	0	0	0	0	0	0	0	0	0	0
2005-03-22	1	1	1	1	1	0	0	0	0	0	0	0	0	0	0	0
2005-03-23	1	1	1	1	1	0	0	0	0	0	0	0	0	0	0	0
2005-03-24	1	1	1	1	1	0	0	0	0	0	0	0	0	0	0	0
2005-03-25	1	1	1	1	1	0	0	0	0	0	0	0	0	0	0	0
2005-03-26	1	1	1	1	1	0	0	0	0	0	0	0	0	0	0	0
2005-03-27	1	1	1	1	1	0	0	0	0	0	0	0	0	0	0	0
2005-03-28	1	1	1	1	1	0	0	0	0	0	0	0	0	0	0	0
2005-03-29	1	1	1	1	1	0	0	0	0	0	0	0	0	0	0	0
2005-03-30	1	1	1	1	1	0	0	0	0	0	0	0	0	0	0	0
2005-03-31	1	1	1	1	1	0	0	0	0	0	0	0	0	0	0	0
2005-04-01	1	1	1	1	1	0	0	0	0	0	0	0	0	0	0	0
2005-04-02	1	1	1	1	1	0	0	0	0	0	0	0	0	0	0	0
2005-04-03	1	1	1	1	1	0	0	0	0	0	0	0	0	0	0	0
2005-04-04	1	1	1	1	1	0	0	0	0	0	0	0	0	0	0	0
2005-04-05	1	1	1	1	1	0	0	0	0	0	0	0	0	0	0	0
2005-04-06	1	1	1	1	1	0	0	0	0	0	0	0	0	0	0	0
2005-04-07	1	1	1	1	1	0	0	0	0	0	0	0	0	0	0	0
2005-04-08	1	1	1	1	1	0	0	0	0	0	0	0	0	0	0	0
2005-04-09	1	1	1	1	1	0	0	0	0	0	0	0	0	0	0	0
2005-04-10	1	1	1	1	1	0	0	0	0	0	0	0	0	0	0	0
2005-04-11	1	1	1	1	1	0	0	0	0	0	0	0	0	0	0	0
2005-04-12	1	1	1	1	1	0	0	0	0	0	0	0	0	0	0	0
2005-04-13	1	1	1	1	1	0	0	0	0	0	0	0	0	0	0	0
2005-04-14	1	1	1	1	1	0	0	0	0	0	0	0	0	0	0	0
2005-04-15	1	1	1	1	1	0	0	0	0	0	0	0	0	0	0	0
2005-04-16	1	1	1	1	1	0	0	0	0	0	0	0	0	0	0	0
2005-04-17	1	1	1	1	1	0	0	0	0	0	0	0	0	0	0	0
2005-04-18	1	1	1	1	1	0	0	0	0	0	0	0	0	0	0	0
2005-04-19	1	1	1	1	1	0	0	0	0	0	0	0	0	0	0	0
2005-04-20	1	1	1	1	1	0	0	0	0	0	0	0	0	0	0	0
2005-04-21	1	1	1	1	1	0	0	0	0	0	0	0	0	0	0	0
2005-04-22	1	1	1	1	1	0	0	0	0	0	0	0	0	0	0	0
2005-04-23	1	1	1	1	1	0	0	0	0	0	0	0	0	0	0	0
2005-04-24	1	1	1	1	1	0	0	0	0	0	0	0	0	0	0	0
2005-04-25	1	1	1	1	1	0	0	0	0	0	0	0	0	0	0	0
2005-04-26	1	1	1	1	1	0	0	0	0	0	0	0	0	0	0	0
2005-04-27	1	1	1	1	1	0	0	0	0	0	0	0	0	0	0	0
2005-04-28	1	1	1	1	1	0	0	0	0	0	0	0	0	0	0	0
2005-04-29	1	1	1	1	1	0	0	0	0	0	0	0	0	0	0	0
2005-04-30	1	1	1	1	1	0	0	0	0	0	0	0	0	0	0	0
2005-05-01	1	1	1	1	1	0	0	0	0	0	0	0	0	0	0	0
2005-05-02	1	1	1	1	1	0	0	0	0	0	0	0	0	0	0	0
2005-05-03	1	1	1	1	1	0	0	0	0	0	0	0	0	0	0	0
2005-05-04	1	1	1	1	1	0	0	0	0	0	0	0	0	0	0	0
2005-05-05	1	1	1	1	1	0	0	0	0	0	0	0	0	0	0	0
2005-05-06	1	1	1	1	1	0	0	0	0	0	0	0	0	0	0	0
2005-05-07	1	1	1	1	1	0	0	0	0	0	0	0	0	0	0	0
2005-05-08	1	1	1	1	1	0	0	0	0	0	0	0	0	0	0	0
2005-05-09	1	1	1	1	1	0	0	0	0	0	0	0	0	0	0	0
2005-05-10	1	1	1	1	1	0	0	0	0	0	0	0	0	0	0	0
2005-05-11	1	1	1	1	1	0	0	0	0	0	0	0	0	0	0	0
2005-05-12	1	1	1	1	1	0	0	0	0	0	0	0	0	0	0	0
2005-05-13	1	1	1	1	1	0	0	0	0	0	0	0	0	0	0	0
2005-05-14	1	1	1	1	1	0	0	0	0	0	0	0	0	0	0	0
2005-05-15	1	1	1	1	1	0	0	0	0	0	0	0	0	0	0	0
2005-05-16	1	1	1	1	1	0	0	0	0	0	0	0	0	0	0	0
2005-05-17	1	1	1	1	1	0	0	0	0	0	0	0	0	0	0	0
2005-05-18	1	1	1	1	1	0	0	0	0	0	0	0	0	0	0	0
2005-05-19	1	1	1	1	1	0	0	0	0	0	0	0	0	0	0	0
2005-05-20	1	1	1	1	1	0	0	0	0	0	0	0	0	0	0	0
2005-05-21	1	1	1	1	1	0	0	0	0	0	0	0	0	0	0	0
2005-05-22	1	1	1	1	1	0	0	0	0	0	0	0	0	0	0	0
2005-05-23	1	1	1	1	1	0	0	0	0	0	0	0	0	0	0	0
2005-05-24	1	1	1	1	1	0	0	0	0	0	0	0	0	0	0	0
2005-05-25	1	1	1	1	1	0	0	0	0	0	0	0	0	0	0	0
2005-05-26	1	1	1	1	1	0	0	0	0	0	0	0	0	0	0	0
2005-05-27	1	1	1	1	1	0	0	0	0	0	0	0	0	0	0	0
2005-05-28	1	1	1	1	1	0	0	0	0	0	0	0	0	0	0	0
2005-05-29	1	1	1	1	1	0	0	0	0	0	0	0	0	0	0	0
2005-05-30	1	1	1	1	1	0	0	0	0	0	0	0	0	0	0	0
2005-05-31	1	1	1	1	1	0	0	0	0	0	0	0	0	0	0	0
2005-06-01	1	1	1	1	1	0	0	0	0	0	0	0	0	0	0	0
2005-06-02	1	1	1	1	1	0	0	0	0	0	0	0	0	0	0	0
2005-06-03	1	1	1	1	1	0	0	0	0	0	0	0	0	0	0	0
2005-06-04	1	1	1	1	1	0	0	0	0	0	0	0	0	0	0	0
2005-06-05	1	1	1	1	1	0	0	0	0	0	0	0	0	0	0	0
2005-06-06	1	1	1	1	1	0	0	0	0	0	0	0	0	0	0	0
2005-06-07	1	1	1	1	1	0	0	0	0	0	0	0	0	0	0	0
2005-06-08	1	1	1	1	1	0	0	0	0	0	0	0	0	0	0	0
2005-06-09	1	1	1	1	1	0	0	0	0	0	0	0	0	0	0	0
2005-06-10	1	1	1	1	1	0	0	0	0	0	0	0	0	0	0	0
2005-06-11	1	1	1	1	1	0	0	0	0	0	0	0	0	0	0	0
2005-06-12	1	1	1	1	1	0	0	0	0	0	0	0	0	0	0	0
2005-06-13	1	1	1	1	1	0	0	0	0	0	0	0	0	0	0	0
2005-06-14	1	1	1	1	1	0	0	0	0	0	0	0	0	0	0	0
2005-06-15	1	1	1	1	1	0	0	0	0	0	0	0	0	0	0	0
2005-06-16	1	1	1	1	1	0	0	0	0	0	0	0	0	0	0	0
2005-06-17	1	1	1	1	1	0	0	0	0	0	0	0	0	0	0	0
2005-06-18	1	1	1	1	1	0	0	0	0	0	0	0	0	0	0	0
2005-06-19	1	1	1	1	1	0	0	0	0	0	0	0	0	0	0	0
2005-06-20	1	1	1	1	1	0	0	0	0	0	0	0	0	0	0	0
2005-06-21	1	1	1	1	0	0	0	0	0	0	0	0	0	0	0	0
2005-06-22	1	1	1	1	1	0	0	0	0	0	0	0	0	0	0	0
2005-06-23	1	1	1	1	1	0	0	0	0	0	0	0	0	0	0	0
2005-06-24	1	1	1	1	1	0	0	0	0	0	0	0	0	0	0	0
2005-06-25	1	1	1	1	1	0	0	0	0	0	0	0	0	0	0	0
2005-06-26	1	1	1	1	1	0	0	0	0	0	0	0	0	0	0	0
2005-06-27	1	1	1	1	1	0	0	0	0	0	0	0	0	0	0	0
2005-06-28	1	1	1	1	1	0	0	0	0	0	0	0	0	0	0	0
2005-06-29	1	1	1	1	1	0	0	0	0	0	0	0	0	0	0	0
2005-06-30	1	1	1	0	1	0	0	0	0	0	0	0	0	0	0	0
2005-07-01	1	1	1	1	1	0	0	0	0	0	0	0	0	0	0	0
2005-07-02	1	1	1	1	1	0	0	0	0	0	0	0	0	0	0	0
2005-07-03	1	1	1	1	1	0	0	0	0	0	0	0	0	0	0	0
2005-07-04	1	1	1	1	1	0	0	0	0	0	0	0	0	0	0	0
2005-07-05	1	1	1	1	1	0	0	0	0	0	0	0	0	0	0	0
2005-07-06	1	1	1	1	1	0	0	0	0	0	0	0	0	0	0	0
2005-07-07	1	1	1	1	1	0	0	0	0	0	0	0	0	0	0	0
2005-07-08	1	1	1	1	1	0	0	0	0	0	0	0	0	0	0	0
2005-07-09	1	1	1	1	0	0	0	0	0	0	0	0	0	0	0	0
2005-07-10	1	1	1	1	1	0	0	0	0	0	0	0	0	0	0	0
2005-07-11	1	1	1	1	1	0	0	0	0	0	0	0	0	0	0	0
2005-07-12	0	1	0	1	0	0	0	0	0	0	0	0	0	0	0	0
2005-07-13	1	1	1	1	1	0	0	0	0	0	0	0	0	0	0	0
2005-07-14	1	1	1	1	1	0	0	0	0	0	0	0	0	0	0	0
2005-07-15	1	1	1	1	1	0	0	0	0	0	0	0	0	0	0	0
2005-07-16	1	1	1	1	1	0	0	0	0	0	0	0	0	0	0	0
2005-07-17	1	1	1	1	1	0	0	0	0	0	0	0	0	0	0	0
2005-07-18	1	1	1	1	1	0	0	0	0	0	0	0	0	0	0	0
[truncated: 4,914 more rows]
